# Supplementary material
Source: PubMed Central journal article supplement (PMC3650333)
Supplement: supp_M112.024786_mcp.M112.024786-2.pdf [file supp_M112.024786_mcp.M112.024786-2.pdf]

## ***Argonaute2* regulates the pancreatic $\beta$ -cell secretome**

Sudhir G. Tattikota<sup>1,5</sup>, Matthias D. Sury<sup>1,5</sup>, Thomas Rathjen<sup>1,5</sup>, Hans-Hermann Wessels<sup>1</sup>, Amit K. Pandey<sup>1</sup>, Xintian You<sup>1</sup>, Clinton Becker<sup>1</sup>, Wei Chen<sup>1</sup>, Matthias Selbach<sup>1#</sup> and Matthew N. Poy<sup>1#</sup>

### **Supplementary Figure Legends.**

**Supplementary Figure S1.** Inhibition of *miR-375* results in enhanced secretion from MIN6 cells. (A) Western blotting analysis of Ago2 and  $\beta$ -actin after siRNA-mediated knockdown of *Ago2* or *Ago1* compared to scrambled control. (B) qRT-PCR analysis of *miR-375* after inhibition of *miR-375* in MIN6 cells compared to scrambled control (n=3). (C) Comparison of quantitative analysis of proteins present in supernatant after inhibition of *miR-375* in MIN6 cells after incubation in 25mM glucose with an experiment measuring proteins present in the supernatant of MIN6 cells after incubation in 25mM glucose (Hi Glc) versus 2.8mM glucose (Lo Glc). Proteins colored in red are defined as the secretome “signature”. (D) Seed enrichment analysis of genes encoding proteins detected in secretome experiments after either inhibition of *miR-375* (Cnt-375) or incubation with high (Hi Glc) and low glucose (Lo Glc).

**Supplementary Figure S2.** Targets of *miR-375* contribute to insulin secretion. (A) qRT-PCR analysis after siRNA-mediated knockdown of *Gck*, *Elavl4*, *Gphn*, *Ywhaz*, *Cadm1*, *Aifm1*, *Mtpn* and *Eef1e1* in MIN6 cells compared to scrambled control (n=3). (B) Measurement of glucose-stimulated insulin release in MIN6 cells after siRNA-mediated knockdown of *Cadm1*, *Aifm1*, *Mtpn* and *Eef1e1* compared to scrambled controls (n=4).

**Supplementary Figure S3.** Inhibition of *miR-7* results in enhanced secretion in MIN6 cells after treatment with high glucose. (A) qRT-PCR analysis of *miR-7* after inhibition in MIN6 cells relative to scrambled control. (B) Measurement of glucose-stimulated insulin release in MIN6 cells after inhibition of *miR-7* in MIN6 cells compared to scrambled control (n=4). (C) Quantitative analysis of proteins present in supernatant after inhibition of *miR-7* in MIN6 cells after incubation in 25mM glucose compared to scrambled control. Proteins colored in red are defined as the secretome “signature”.

**Supplementary Figure S4.** Loss of Dicer expression in MIN6 regulates insulin expression. (A) Western blotting analysis of Dicer and  $\beta$ -actin after siRNA-mediated knockdown of *Dicer* compared to scrambled control. Measurement of glucose-stimulated insulin release in MIN6 cells after siRNA-mediated knockdown of *Dcr1* and *Gck* compared to scrambled controls (n=4). (B) Normalized reads after knockdown of *Dicer* compared to scrambled control in MIN6 cells. Quantification of microRNA reads in MIN6 cells after siRNA-mediated knockdown of *Dcr1* compared to scrambled control.

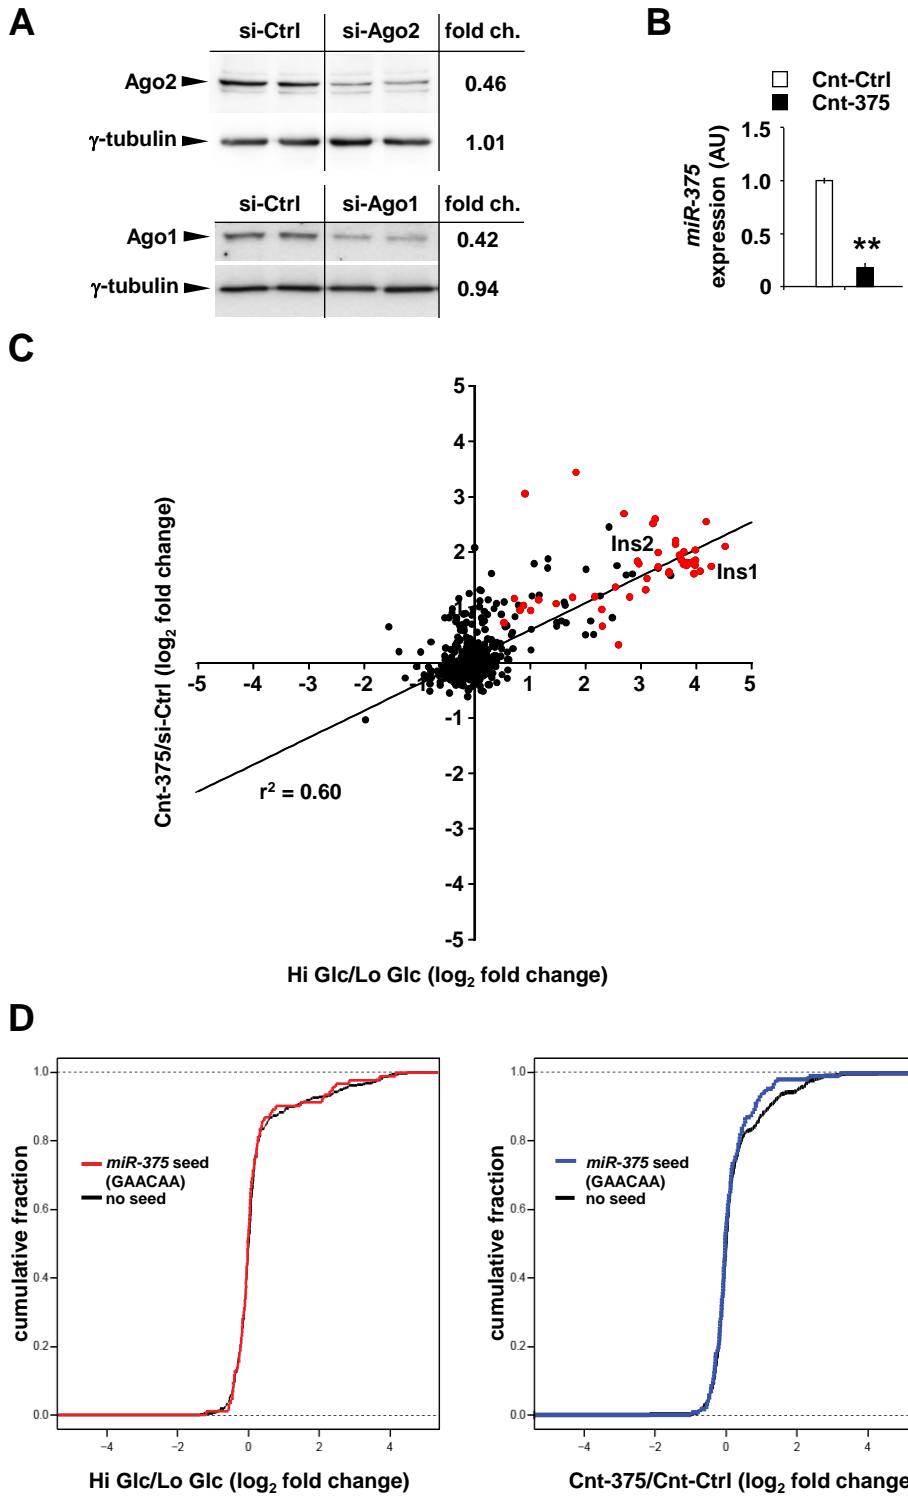

**A**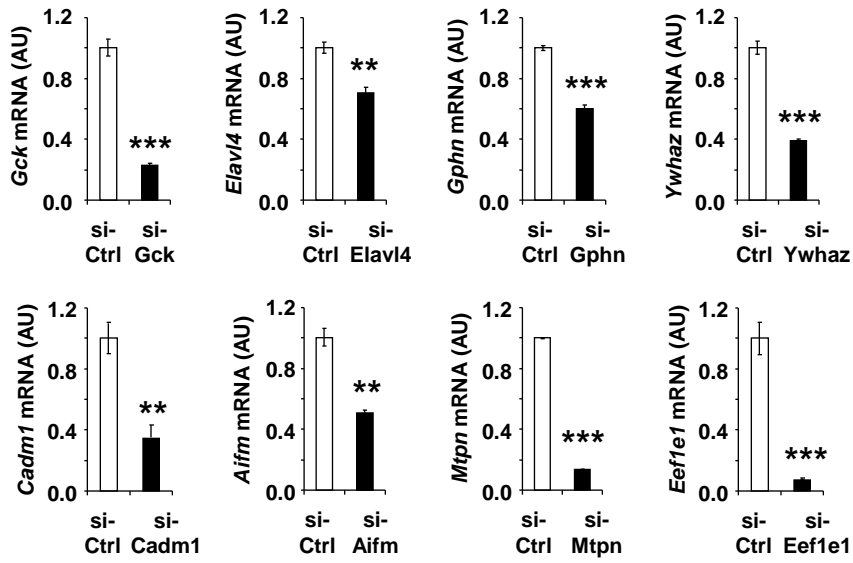**B**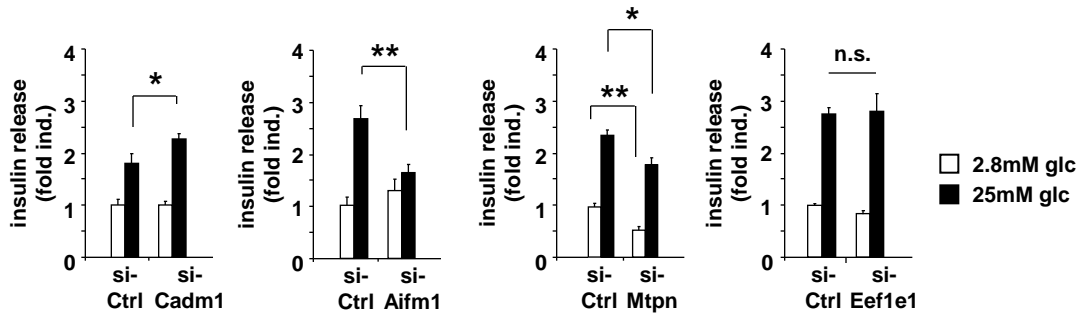

**A**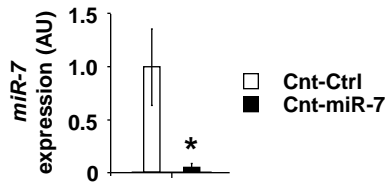**B**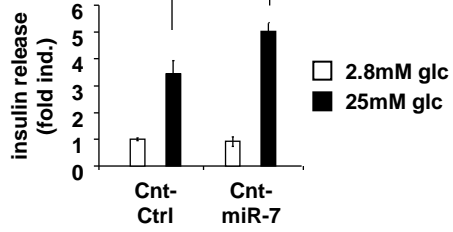**C**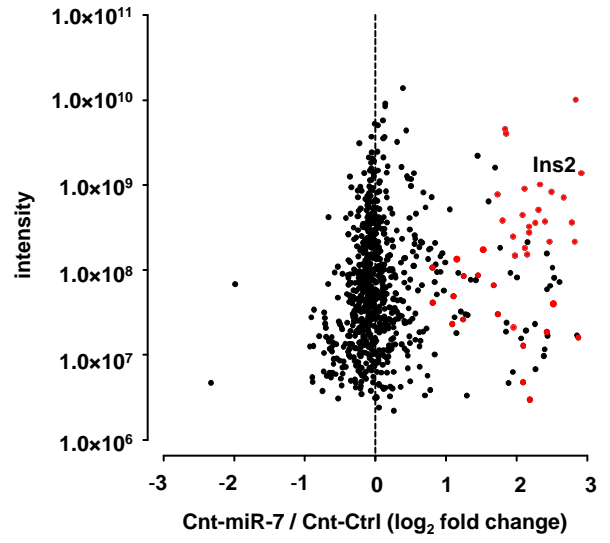

**A**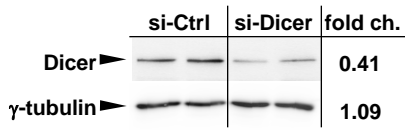**B**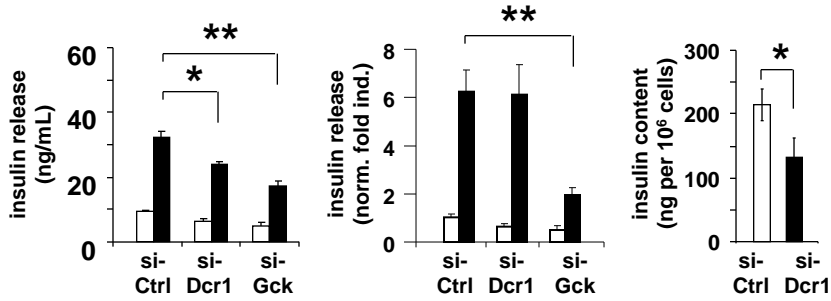**C**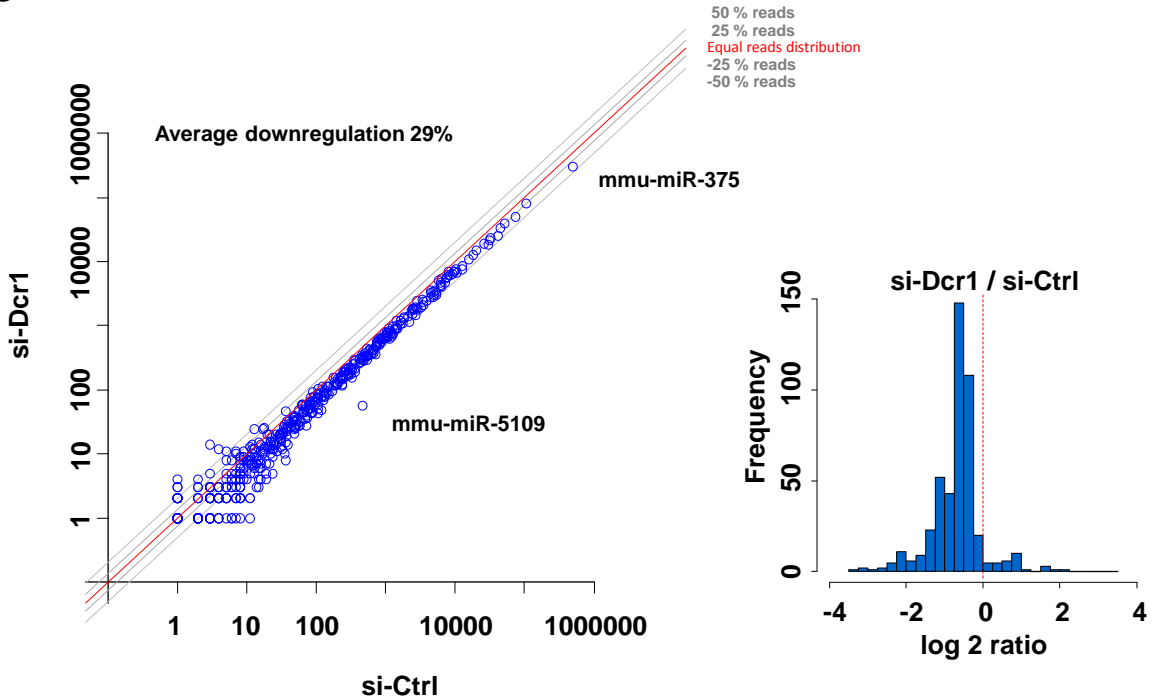

|     | Ratio | FC   | Log2FC |
|-----|-------|------|--------|
| avg | 0.43  | 0.72 | -0.62  |
| sd  | 0.45  | 0.42 | 0.65   |

Supplementary Table 1. Small RNA sequencing analysis of MIN6 cell line and pancreatic islets

| microRNA name   | Wildtype.islets | microRNA name                         | MIN6.cells |
|-----------------|-----------------|---------------------------------------|------------|
| Sum             | 13021878        | Sum                                   | 906365     |
| mmu-miR-375-3p  | 5175302         | mmu-mir-375--3p                       | 339147     |
| mmu-miR-127-3p  | 1959855         | mmu-mir-182--5p                       | 57436      |
| mmu-miR-148a-3p | 1198119         | mmu-mir-30a--5p                       | 41663      |
| mmu-miR-27b-3p  | 1086126         | mmu-mir-148a--3p                      | 38286      |
| mmu-miR-26a-5p  | 450586          | mmu-mir-22--3p                        | 30464      |
| mmu-miR-141-3p  | 290522          | mmu-mir-340--5p                       | 28427      |
| mmu-let-7f-5p   | 260881          | mmu-mir-27b--3p                       | 26346      |
| mmu-miR-22-3p   | 251099          | mmu-mir-30e--5p                       | 25772      |
| mmu-miR-191-5p  | 196033          | mmu-mir-30d--5p                       | 21354      |
| mmu-miR-30a-5p  | 157867          | mmu-mir-191--5p                       | 17112      |
| mmu-miR-143-3p  | 115912          | mmu-mir-26a-1--5p mmu-mir-26a-2--5p   | 16770      |
| mmu-miR-30d-5p  | 88966           | mmu-mir-25--3p                        | 11678      |
| mmu-miR-182-5p  | 85204           | mmu-let-7f-1--5p mmu-let-7f-2--5p     | 11447      |
| mmu-miR-99b-5p  | 83116           | mmu-let-7i--5p                        | 8071       |
| mmu-miR-125a-5p | 78894           | mmu-mir-141--3p                       | 8017       |
| mmu-miR-10a-5p  | 75471           | mmu-mir-26b--5p                       | 7970       |
| mmu-miR-541-5p  | 63169           | mmu-mir-301a--3p                      | 7783       |
| mmu-miR-10b-5p  | 60769           | mmu-let-7c-1--5p mmu-let-7c-2--5p     | 7518       |
| mmu-miR-429-3p  | 58102           | mmu-mir-16-1--5p mmu-mir-16-2--5p     | 6685       |
| mmu-let-7c-5p   | 57183           | mmu-mir-183--5p                       | 6615       |
| mmu-let-7a-5p   | 56694           | mmu-mir-186--5p                       | 5689       |
| mmu-miR-411-5p  | 48528           | mmu-mir-30b--5p                       | 5681       |
| mmu-miR-434-3p  | 42040           | mmu-mir-378--3p                       | 5621       |
| mmu-miR-16-5p   | 41814           | mmu-mir-21--5p                        | 5444       |
| mmu-let-7g-5p   | 38054           | mmu-mir-29a--3p                       | 5429       |
| mmu-miR-126-5p  | 37930           | mmu-let-7a-1--5p mmu-let-7a-2--5p     | 5088       |
| mmu-miR-192-5p  | 37710           | mmu-mir-30c-1--5p mmu-mir-30c-2--5p   | 5068       |
| mmu-miR-410-3p  | 29952           | mmu-let-7b--5p                        | 4765       |
| mmu-let-7i-5p   | 29295           | mmu-mir-93--5p                        | 4502       |
| mmu-miR-151-3p  | 28957           | mmu-mir-148b--3p                      | 4469       |
| mmu-miR-29a-3p  | 27334           | mmu-mir-101a--3p                      | 4332       |
| mmu-miR-200a-3p | 27113           | mmu-mir-125a--5p                      | 4304       |
| mmu-miR-184-3p  | 26750           | mmu-mir-181a-1--5p mmu-mir-181a-2--5p | 4269       |
| mmu-miR-181a-5p | 26425           | mmu-mir-99b--5p                       | 3981       |
| mmu-miR-200c-3p | 22885           | mmu-mir-192--5p                       | 3784       |
| mmu-miR-26b-5p  | 22583           | mmu-let-7g--5p                        | 3343       |
| mmu-miR-204-5p  | 22209           | mmu-mir-879--5p                       | 3130       |
| mmu-miR-30c-5p  | 22052           | mmu-mir-151--3p                       | 3043       |
| mmu-let-7e-5p   | 20023           | mmu-mir-106b--5p                      | 2940       |
| mmu-miR-200b-3p | 17570           | mmu-mir-98--5p                        | 2858       |
| mmu-miR-30e-5p  | 17277           | mmu-mir-488--3p                       | 2758       |
| mmu-let-7b-5p   | 16382           | mmu-mir-7a-1--5p mmu-mir-7a-2--5p     | 2684       |
| mmu-miR-409-3p  | 15887           | mmu-mir-101b--3p                      | 2610       |
| mmu-miR-23b-3p  | 15332           | mmu-mir-151--5p                       | 2463       |
| mmu-miR-151-5p  | 15139           | mmu-mir-138-1--5p mmu-mir-138-2--5p   | 2368       |
| mmu-miR-7a-5p   | 15024           | mmu-mir-200c--3p                      | 2340       |
| mmu-miR-183-5p  | 14968           | mmu-mir-130a--3p                      | 2312       |
| mmu-miR-136-3p  | 14754           | mmu-let-7d--5p                        | 2263       |
| mmu-miR-25-3p   | 14051           | mmu-mir-140--3p                       | 2131       |
| mmu-miR-101a-3p | 13998           | mmu-mir-484--5p                       | 2052       |
| mmu-miR-186-5p  | 13226           | mmu-mir-345--5p                       | 1933       |
| mmu-miR-24-3p   | 13102           | mmu-mir-384--3p                       | 1656       |
| mmu-miR-340-5p  | 13024           | mmu-mir-483--3p                       | 1617       |
| mmu-miR-215-5p  | 13022           | mmu-mir-342--3p                       | 1574       |
| mmu-miR-103-3p  | 12292           | mmu-mir-153--3p                       | 1572       |
| mmu-miR-148b-3p | 11516           | mmu-mir-7a-2--3p                      | 1534       |
| mmu-miR-381-3p  | 10861           | mmu-mir-146b--5p                      | 1533       |
| mmu-miR-92b-3p  | 10830           | mmu-mir-872--3p                       | 1468       |
| mmu-let-7d-5p   | 9927            | mmu-mir-421--3p                       | 1449       |

|                  |      |                                       |      |
|------------------|------|---------------------------------------|------|
| mmu-miR-378-3p   | 9737 | mmu-mir-130b--3p                      | 1442 |
| mmu-miR-21-5p    | 9728 | mmu-mir-15b--5p                       | 1440 |
| mmu-miR-434-5p   | 7816 | mmu-mir-103-1--3p mmu-mir-103-2--3p   | 1439 |
| mmu-miR-98-5p    | 7808 | mmu-mir-423--3p                       | 1273 |
| mmu-miR-125b-5p  | 7446 | mmu-mir-384--5p                       | 1229 |
| mmu-miR-27a-3p   | 7380 | mmu-mir-331--3p                       | 1187 |
| mmu-miR-181c-5p  | 7346 | mmu-mir-383--5p                       | 1166 |
| mmu-miR-148a-5p  | 7313 | mmu-mir-29c--3p                       | 1148 |
| mmu-miR-431-5p   | 7025 | mmu-mir-23b--3p                       | 1106 |
| mmu-miR-423-5p   | 6979 | mmu-mir-92b--3p                       | 1055 |
| mmu-miR-30b-5p   | 6882 | mmu-mir-700--5p                       | 1050 |
| mmu-miR-1839-5p  | 6673 | mmu-mir-7b--5p                        | 988  |
| mmu-miR-92a-3p   | 6343 | mmu-mir-455--5p                       | 969  |
| mmu-miR-134-5p   | 6131 | mmu-mir-532--5p                       | 949  |
| mmu-miR-129-5p   | 5810 | mmu-mir-200b--3p                      | 924  |
| mmu-miR-7b-5p    | 5807 | mmu-mir-320--3p                       | 870  |
| mmu-miR-146a-5p  | 5656 | mmu-mir-455--3p                       | 820  |
| mmu-miR-126-3p   | 5428 | mmu-mir-129-1--3p                     | 812  |
| mmu-miR-31-5p    | 5282 | mmu-mir-184--3p                       | 806  |
| mmu-miR-30a-3p   | 5078 | mmu-mir-325--3p                       | 776  |
| mmu-miR-146b-5p  | 4844 | mmu-mir-582--5p                       | 756  |
| mmu-miR-129-2-3p | 4283 | mmu-mir-744--5p                       | 737  |
| mmu-miR-421-3p   | 4275 | mmu-let-7e--5p                        | 736  |
| mmu-miR-676-3p   | 4138 | mmu-let-7d--3p                        | 701  |
| mmu-miR-29c-3p   | 3875 | mmu-mir-598--3p                       | 700  |
| mmu-miR-136-5p   | 3669 | mmu-mir-423--5p                       | 696  |
| mmu-miR-7a-2-3p  | 3650 | mmu-mir-374--5p                       | 682  |
| mmu-miR-673-5p   | 3599 | mmu-mir-129-1--5p mmu-mir-129-2--5p   | 658  |
| mmu-miR-300-3p   | 3544 | mmu-mir-301b--3p                      | 641  |
| mmu-miR-379-5p   | 3533 | mmu-mir-29b-1--3p mmu-mir-29b-2--3p   | 617  |
| mmu-miR-30e-3p   | 3449 | mmu-mir-328--3p                       | 616  |
| mmu-miR-425-5p   | 3439 | mmu-mir-324--5p                       | 603  |
| mmu-miR-132-3p   | 3423 | mmu-mir-15b--3p                       | 601  |
| mmu-miR-341-3p   | 3255 | mmu-mir-3099--3p                      | 601  |
| mmu-miR-486-5p   | 3255 | mmu-mir-30e--3p                       | 572  |
| mmu-miR-3107-5p  | 3232 | mmu-mir-195--5p                       | 570  |
| mmu-let-7d-3p    | 3165 | mmu-mir-5115--5p                      | 555  |
| mmu-miR-328-3p   | 3160 | mmu-mir-872--5p                       | 554  |
| mmu-miR-423-3p   | 3148 | mmu-mir-152--5p                       | 551  |
| mmu-miR-129-1-3p | 3126 | mmu-mir-181b-1--5p mmu-mir-181b-2--5p | 535  |
| mmu-miR-203-3p   | 3065 | mmu-mir-24-1--3p mmu-mir-24-2--3p     | 535  |
| mmu-miR-140-3p   | 3039 | mmu-mir-128-1--3p mmu-mir-128-2--3p   | 517  |
| mmu-miR-652-3p   | 2974 | mmu-mir-27a--3p                       | 512  |
| mmu-miR-28-5p    | 2887 | mmu-mir-361--5p                       | 508  |
| mmu-miR-152-3p   | 2727 | mmu-mir-1839--5p                      | 502  |
| mmu-miR-153-3p   | 2686 | mmu-mir-425--5p                       | 496  |
| mmu-miR-101b-3p  | 2663 | mmu-mir-344d-1--3p mmu-mir-344d-2--3p | 492  |
| mmu-miR-668-3p   | 2583 | mmu-mir-429--3p                       | 480  |
| mmu-miR-34c-5p   | 2576 | mmu-mir-34a--5p                       | 468  |
| mmu-miR-130a-3p  | 2406 | mmu-mir-132--3p                       | 463  |
| mmu-miR-23a-3p   | 2380 | mmu-mir-15a--5p                       | 462  |
| mmu-miR-15a-5p   | 2378 | mmu-mir-720--3p                       | 431  |
| mmu-miR-574-3p   | 2339 | mmu-mir-652--3p                       | 426  |
| mmu-miR-720      | 2277 | mmu-mir-30a--3p                       | 421  |
| mmu-miR-540-3p   | 1992 | mmu-mir-152--3p                       | 412  |
| mmu-miR-205-5p   | 1923 | mmu-mir-345--3p                       | 385  |
| mmu-miR-194-5p   | 1825 | mmu-mir-338--3p                       | 381  |
| mmu-miR-369-5p   | 1810 | mmu-mir-330--5p                       | 378  |
| mmu-miR-107-3p   | 1809 | mmu-let-7b--3p                        | 374  |
| mmu-miR-383-5p   | 1711 | mmu-mir-106b--3p                      | 368  |
| mmu-miR-128-3p   | 1650 | mmu-mir-344-1--3p mmu-mir-344-2--3p   | 367  |
| mmu-miR-342-3p   | 1630 | mmu-mir-708--3p                       | 364  |
| mmu-miR-320-3p   | 1607 | mmu-mir-137--3p                       | 350  |

|                   |      |                                        |     |
|-------------------|------|----------------------------------------|-----|
| mmu-miR-872-5p    | 1577 | mmu-mir-148a--5p                       | 342 |
| mmu-miR-532-5p    | 1530 | mmu-mir-340--3p                        | 340 |
| mmu-miR-1843-5p   | 1467 | mmu-mir-32--5p                         | 325 |
| mmu-miR-671-3p    | 1466 | mmu-mir-200a--3p                       | 290 |
| mmu-miR-3099-3p   | 1450 | mmu-mir-1198--5p                       | 286 |
| mmu-miR-484       | 1446 | mmu-mir-130b--5p                       | 285 |
| mmu-miR-744-5p    | 1442 | mmu-mir-3102--3p                       | 285 |
| mmu-miR-879-5p    | 1436 | mmu-mir-497--5p                        | 284 |
| mmu-miR-666-5p    | 1395 | mmu-mir-107--3p                        | 280 |
| mmu-miR-384-5p    | 1372 | mmu-mir-1224--5p                       | 267 |
| mmu-miR-433-3p    | 1371 | mmu-mir-339--5p                        | 259 |
| mmu-miR-1198-5p   | 1369 | mmu-mir-149--5p                        | 253 |
| mmu-miR-221-3p    | 1316 | mmu-mir-96--5p                         | 247 |
| mmu-miR-130b-3p   | 1306 | mmu-mir-28--5p                         | 243 |
| mmu-miR-301a-3p   | 1250 | mmu-mir-671--5p                        | 243 |
| mmu-miR-222-3p    | 1217 | mmu-mir-181a-1--3p                     | 226 |
| mmu-miR-382-5p    | 1211 | mmu-mir-671--3p                        | 225 |
| mmu-miR-369-3p    | 1193 | mmu-mir-210--3p                        | 224 |
| mmu-miR-181b-5p   | 1156 | mmu-mir-488--5p                        | 213 |
| mmu-miR-338-3p    | 1114 | mmu-mir-574--3p                        | 213 |
| mmu-miR-30c-2-3p  | 1002 | mmu-mir-700--3p                        | 213 |
| mmu-miR-361-5p    | 989  | mmu-mir-361--3p                        | 205 |
| mmu-miR-487b-3p   | 965  | mmu-mir-708--5p                        | 201 |
| mmu-miR-335-3p    | 955  | mmu-mir-125b-1--5p mmu-mir-125b-2--5p  | 198 |
| mmu-miR-1843b-5p  | 933  | mmu-mir-185--5p                        | 198 |
| mmu-miR-195-5p    | 933  | mmu-mir-324--3p                        | 192 |
| mmu-miR-666-3p    | 894  | mmu-mir-669c--5p                       | 191 |
| mmu-miR-582-3p    | 817  | mmu-mir-148b--5p                       | 186 |
| mmu-miR-99a-5p    | 793  | mmu-mir-325--5p                        | 181 |
| mmu-let-7b-3p     | 739  | mmu-mir-467e--5p                       | 179 |
| mmu-miR-673-3p    | 727  | mmu-mir-23a--3p                        | 177 |
| mmu-miR-664-3p    | 683  | mmu-mir-350--5p                        | 176 |
| mmu-miR-598-3p    | 672  | mmu-mir-124-1--3p mmu-mir-124-2--3p mn | 172 |
| mmu-miR-187-3p    | 670  | mmu-mir-676--3p                        | 171 |
| mmu-miR-574-5p    | 640  | mmu-mir-467d--5p                       | 170 |
| mmu-miR-351-5p    | 639  | mmu-mir-298--5p                        | 168 |
| mmu-miR-330-5p    | 618  | mmu-mir-574--5p                        | 163 |
| mmu-miR-28-3p     | 617  | mmu-mir-483--5p                        | 162 |
| mmu-miR-125b-1-3p | 616  | mmu-mir-467c--5p                       | 152 |
| mmu-miR-667-3p    | 590  | mmu-mir-30d--3p                        | 150 |
| mmu-miR-1224-5p   | 569  | mmu-mir-140--5p                        | 149 |
| mmu-miR-485-5p    | 562  | mmu-mir-1983--3p                       | 147 |
| mmu-miR-141-5p    | 552  | mmu-mir-350--3p                        | 145 |
| mmu-miR-376b-3p   | 552  | mmu-mir-1249--3p                       | 140 |
| mmu-miR-340-3p    | 544  | mmu-mir-1839--3p                       | 140 |
| mmu-miR-106b-3p   | 540  | mmu-mir-16-2--3p                       | 138 |
| mmu-miR-323-3p    | 540  | mmu-mir-183--3p                        | 135 |
| mmu-miR-181d-5p   | 537  | mmu-let-7c-2--3p                       | 132 |
| mmu-miR-93-5p     | 535  | mmu-mir-129-2--3p                      | 124 |
| mmu-miR-872-3p    | 524  | mmu-mir-532--3p                        | 123 |
| mmu-miR-212-3p    | 520  | mmu-let-7f-2--3p                       | 122 |
| mmu-miR-30d-3p    | 513  | mmu-mir-22--5p                         | 115 |
| mmu-miR-154-5p    | 499  | mmu-mir-339--3p                        | 114 |
| mmu-miR-34b-3p    | 491  | mmu-mir-670--3p                        | 114 |
| mmu-miR-345-3p    | 485  | mmu-mir-188--5p                        | 112 |
| mmu-miR-29b-3p    | 474  | mmu-let-7a-1--3p                       | 111 |
| mmu-miR-200a-5p   | 468  | mmu-mir-141--5p                        | 111 |
| mmu-miR-27b-5p    | 466  | mmu-mir-212--3p                        | 104 |
| mmu-miR-361-3p    | 455  | mmu-mir-690--3p                        | 103 |
| mmu-miR-150-5p    | 432  | mmu-mir-28--3p                         | 101 |
| mmu-miR-700-5p    | 411  | mmu-mir-16-1--3p                       | 97  |
| mmu-miR-24-2-5p   | 401  | mmu-mir-187--3p                        | 96  |
| mmu-miR-125a-3p   | 378  | mmu-mir-125b-2--3p                     | 95  |



|                   |     |                                        |    |
|-------------------|-----|----------------------------------------|----|
| mmu-miR-411-3p    | 378 | mmu-mir-7a-1--3p                       | 95 |
| mmu-miR-130b-5p   | 374 | mmu-let-7i--3p                         | 94 |
| mmu-miR-339-5p    | 344 | mmu-let-7f-1--3p                       | 92 |
| mmu-miR-345-5p    | 329 | mmu-mir-877--5p                        | 90 |
| mmu-miR-1839-3p   | 328 | mmu-mir-29a--5p                        | 83 |
| mmu-miR-15b-5p    | 327 | mmu-mir-338--5p                        | 79 |
| mmu-miR-335-5p    | 308 | mmu-mir-99b--3p                        | 79 |
| mmu-miR-497-5p    | 308 | mmu-mir-3068--3p                       | 78 |
| mmu-miR-200b-5p   | 296 | mmu-mir-1843--5p                       | 77 |
| mmu-miR-485-3p    | 296 | mmu-mir-677--5p                        | 77 |
| mmu-miR-374-5p    | 291 | mmu-mir-99a--5p                        | 77 |
| mmu-miR-3102-3p   | 283 | mmu-mir-24-2--5p                       | 76 |
| mmu-miR-376b-5p   | 283 | mmu-mir-378--5p                        | 76 |
| mmu-miR-96-5p     | 283 | mmu-mir-128-1--5p                      | 71 |
| mmu-miR-676-5p    | 282 | mmu-mir-3096--5p                       | 71 |
| mmu-miR-127-5p    | 277 | mmu-mir-669o--5p                       | 67 |
| mmu-miR-370-3p    | 277 | mmu-mir-874--3p                        | 67 |
| mmu-miR-26b-3p    | 273 | mmu-mir-98--3p                         | 66 |
| mmu-let-7f-2-3p   | 272 | mmu-mir-5117--3p                       | 65 |
| mmu-miR-142-5p    | 272 | mmu-mir-330--3p                        | 64 |
| mmu-miR-376c-3p   | 272 | mmu-mir-212--5p                        | 63 |
| mmu-miR-199a-3p   | 271 | mmu-mir-30c-2--3p                      | 63 |
| mmu-miR-384-3p    | 269 | mmu-mir-26b--3p                        | 62 |
| mmu-miR-301b-3p   | 264 | mmu-mir-362--3p                        | 62 |
| mmu-miR-212-5p    | 262 | mmu-mir-5121--3p                       | 62 |
| mmu-miR-1981-3p   | 255 | mmu-mir-132--5p                        | 60 |
| mmu-miR-152-5p    | 253 | mmu-mir-190--5p                        | 60 |
| mmu-miR-298-5p    | 253 | mmu-mir-194-1--5p mmu-mir-194-2--5p    | 57 |
| mmu-miR-100-5p    | 250 | mmu-mir-195--3p                        | 56 |
| mmu-miR-322-5p    | 249 | mmu-mir-1843b--5p                      | 53 |
| mmu-miR-337-3p    | 247 | mmu-mir-3096b--5p                      | 52 |
| mmu-miR-148b-5p   | 246 | mmu-mir-3068--5p                       | 51 |
| mmu-miR-1943-5p   | 242 | mmu-mir-501--3p                        | 51 |
| mmu-miR-329-5p    | 230 | mmu-mir-5109--3p                       | 51 |
| mmu-miR-32-5p     | 228 | mmu-mir-29c--5p                        | 50 |
| mmu-miR-671-5p    | 220 | mmu-mir-301a--5p                       | 50 |
| mmu-miR-30c-1-3p  | 218 | mmu-mir-1947--5p                       | 49 |
| mmu-miR-501-3p    | 215 | mmu-mir-25--5p                         | 48 |
| mmu-let-7a-1-3p   | 210 | mmu-mir-24-1--5p                       | 47 |
| mmu-let-7c-2-3p   | 210 | mmu-mir-425--3p                        | 47 |
| mmu-miR-145-3p    | 207 | mmu-mir-744--3p                        | 47 |
| mmu-miR-379-3p    | 205 | mmu-mir-344d-3--5p                     | 46 |
| mmu-miR-1249-3p   | 202 | mmu-mir-93--3p                         | 46 |
| mmu-miR-330-3p    | 202 | mmu-mir-221--3p                        | 44 |
| mmu-miR-325-3p    | 200 | mmu-mir-467a-1--5p mmu-mir-467a-10--5p | 44 |
| mmu-miR-99b-3p    | 199 | mmu-let-7g--3p                         | 43 |
| mmu-miR-98-3p     | 193 | mmu-mir-219-1--3p                      | 43 |
| mmu-miR-125b-2-3p | 190 | mmu-mir-466c-1--5p mmu-mir-466c-2--5p  | 43 |
| mmu-miR-3068-3p   | 190 | mmu-mir-500--3p                        | 43 |
| mmu-miR-380-3p    | 188 | mmu-mir-466g--3p                       | 42 |
| mmu-miR-19b-3p    | 186 | mmu-mir-669l--5p                       | 42 |
| mmu-miR-425-3p    | 186 | mmu-mir-15a--3p                        | 41 |
| mmu-miR-132-5p    | 184 | mmu-mir-126--5p                        | 40 |
| mmu-miR-5109      | 180 | mmu-mir-215--5p                        | 39 |
| mmu-miR-145-5p    | 175 | mmu-mir-3107--5p                       | 39 |
| mmu-let-7e-3p     | 170 | mmu-mir-346--5p                        | 39 |
| mmu-miR-149-5p    | 164 | mmu-mir-486--5p                        | 37 |
| mmu-miR-708-3p    | 161 | mmu-mir-222--3p                        | 36 |
| mmu-miR-1981-5p   | 160 | mmu-mir-296--5p                        | 36 |
| mmu-miR-700-3p    | 158 | mmu-mir-3082--3p                       | 36 |
| mmu-miR-34c-3p    | 152 | mmu-mir-664--3p                        | 36 |
| mmu-miR-874-3p    | 149 | mmu-mir-21--3p                         | 35 |
| mmu-miR-1947-5p   | 147 | mmu-mir-466h--5p                       | 33 |

|                   |     |                                        |    |
|-------------------|-----|----------------------------------------|----|
| mmu-miR-3082-3p   | 144 | mmu-mir-33--5p                         | 32 |
| mmu-miR-1843b-3p  | 141 | mmu-mir-344c--3p                       | 32 |
| mmu-miR-138-5p    | 139 | mmu-mir-7b--3p                         | 32 |
| mmu-miR-500-3p    | 139 | mmu-mir-204--5p                        | 30 |
| mmu-miR-5115      | 139 | mmu-mir-27b--5p                        | 30 |
| mmu-miR-540-5p    | 133 | mmu-mir-3470b--5p                      | 30 |
| mmu-miR-199b-3p   | 131 | mmu-mir-122--5p                        | 29 |
| mmu-miR-219-1-3p  | 131 | mmu-mir-5099--3p                       | 29 |
| mmu-let-7i-3p     | 128 | mmu-mir-669d--5p mmu-mir-669d-2--5p    | 28 |
| mmu-miR-7a-1-3p   | 128 | mmu-mir-33--3p                         | 27 |
| mmu-miR-181c-3p   | 126 | mmu-mir-877--3p                        | 27 |
| mmu-miR-299-3p    | 124 | mmu-mir-101a--5p                       | 26 |
| mmu-miR-322-3p    | 124 | mmu-mir-143--3p                        | 26 |
| mmu-miR-22-5p     | 122 | mmu-mir-3078--5p                       | 26 |
| mmu-miR-106b-5p   | 119 | mmu-mir-669a-1--3p mmu-mir-669a-10--3p | 26 |
| mmu-miR-210-3p    | 119 | mmu-mir-3057--5p                       | 25 |
| mmu-miR-496-3p    | 119 | mmu-mir-669f--5p                       | 24 |
| mmu-miR-329-3p    | 116 | mmu-mir-676--5p                        | 24 |
| mmu-miR-30b-3p    | 114 | mmu-mir-146a--5p                       | 23 |
| mmu-miR-181a-1-3p | 112 | mmu-mir-383--3p                        | 23 |
| mmu-miR-376a-5p   | 110 | mmu-mir-466d--3p                       | 23 |
| mmu-miR-409-5p    | 110 | mmu-mir-125a--3p                       | 22 |
| mmu-let-7f-1-3p   | 109 | mmu-mir-138-2--3p                      | 22 |
| mmu-miR-344-3p    | 108 | mmu-mir-26a-2--3p                      | 22 |
| mmu-miR-412-5p    | 107 | mmu-mir-3473d--5p                      | 22 |
| mmu-miR-128-1-5p  | 105 | mmu-mir-362--5p                        | 22 |
| mmu-miR-350-5p    | 102 | mmu-mir-1968--5p                       | 21 |
| mmu-miR-665-3p    | 102 | mmu-mir-541--5p                        | 21 |
| mmu-miR-376a-3p   | 100 | mmu-mir-669a-1--5p mmu-mir-669a-10--5p | 21 |
| mmu-miR-185-5p    | 99  | mmu-mir-1194--3p                       | 20 |
| mmu-miR-543-3p    | 96  | mmu-mir-186--3p                        | 20 |
| mmu-miR-664-5p    | 95  | mmu-mir-203--3p                        | 20 |
| mmu-miR-879-3p    | 95  | mmu-mir-30c-1--3p                      | 20 |
| mmu-miR-7b-3p     | 94  | mmu-mir-32--3p                         | 20 |
| mmu-miR-339-3p    | 91  | mmu-mir-421--5p                        | 20 |
| mmu-miR-670-3p    | 91  | mmu-mir-10b--5p                        | 18 |
| mmu-miR-375-5p    | 86  | mmu-mir-135a-1--5p mmu-mir-135a-2--5p  | 17 |
| mmu-miR-325-5p    | 85  | mmu-mir-191--3p                        | 17 |
| mmu-miR-27a-5p    | 84  | mmu-mir-30b--3p                        | 17 |
| mmu-miR-495-3p    | 84  | mmu-mir-669e--5p                       | 17 |
| mmu-miR-139-5p    | 83  | mmu-mir-10a--5p                        | 16 |
| mmu-miR-337-5p    | 83  | mmu-mir-1199--5p                       | 16 |
| mmu-miR-3057-5p   | 82  | mmu-mir-127--3p                        | 16 |
| mmu-miR-34b-5p    | 82  | mmu-mir-1981--3p                       | 16 |
| mmu-miR-1964-3p   | 80  | mmu-mir-297b--5p                       | 16 |
| mmu-miR-331-3p    | 79  | mmu-mir-410--3p                        | 16 |
| mmu-miR-338-5p    | 77  | mmu-mir-802--5p                        | 16 |
| mmu-miR-770-3p    | 73  | mmu-mir-1981--5p                       | 15 |
| mmu-miR-350-3p    | 72  | mmu-mir-219-1--5p mmu-mir-219-2--5p    | 15 |
| mmu-miR-24-1-5p   | 71  | mmu-mir-3061--3p                       | 15 |
| mmu-miR-802-5p    | 71  | mmu-mir-3066--5p                       | 15 |
| mmu-miR-324-3p    | 70  | mmu-mir-3084--3p                       | 15 |
| mmu-miR-377-5p    | 70  | mmu-mir-1191--3p                       | 14 |
| mmu-miR-34a-5p    | 68  | mmu-mir-1196--5p                       | 14 |
| mmu-miR-674-3p    | 68  | mmu-mir-1933--3p                       | 14 |
| mmu-miR-377-3p    | 65  | mmu-mir-2137--3p                       | 14 |
| mmu-miR-195-3p    | 63  | mmu-mir-582--3p                        | 14 |
| mmu-miR-3072-3p   | 63  | mmu-mir-669b--5p                       | 14 |
| mmu-miR-342-5p    | 63  | mmu-mir-29b-2--5p                      | 13 |
| mmu-miR-532-3p    | 63  | mmu-mir-3074-1--3p                     | 13 |
| mmu-miR-708-5p    | 62  | mmu-mir-3098--5p                       | 13 |
| mmu-miR-877-5p    | 62  | mmu-mir-3473b--3p                      | 13 |
| mmu-miR-1843-3p   | 61  | mmu-mir-375--5p                        | 13 |

|                  |    |                                         |    |
|------------------|----|-----------------------------------------|----|
| mmu-miR-218-5p   | 61 | mmu-mir-672--5p                         | 13 |
| mmu-miR-221-5p   | 61 | mmu-mir-9-1--5p mmu-mir-9-2--5p mmu-m   | 13 |
| mmu-miR-3096-5p  | 61 | mmu-mir-200c--5p                        | 12 |
| mmu-miR-582-5p   | 61 | mmu-mir-3096b--3p                       | 12 |
| mmu-miR-877-3p   | 61 | mmu-mir-664--5p                         | 12 |
| mmu-miR-378-5p   | 60 | mmu-mir-669a-3--3p                      | 12 |
| mmu-miR-217-5p   | 59 | mmu-mir-1843b--3p                       | 11 |
| mmu-miR-224-5p   | 59 | mmu-mir-1964--3p                        | 11 |
| mmu-miR-299-5p   | 58 | mmu-mir-296--3p                         | 11 |
| mmu-miR-539-5p   | 58 | mmu-mir-3473--3p                        | 11 |
| mmu-miR-9-5p     | 58 | mmu-mir-466n--3p                        | 11 |
| mmu-miR-1193-3p  | 54 | mmu-mir-670--5p                         | 11 |
| mmu-miR-215-3p   | 54 | mmu-let-7e--3p                          | 10 |
| mmu-miR-324-5p   | 52 | mmu-mir-124-1--5p mmu-mir-124-2--5p mn  | 10 |
| mmu-miR-17-5p    | 51 | mmu-mir-126--3p                         | 10 |
| mmu-miR-431-3p   | 50 | mmu-mir-1934--5p                        | 10 |
| mmu-miR-1193-5p  | 48 | mmu-mir-210--5p                         | 10 |
| mmu-miR-672-5p   | 48 | mmu-mir-29b-1--5p                       | 10 |
| mmu-miR-222-5p   | 47 | mmu-mir-3060--3p                        | 10 |
| mmu-miR-296-5p   | 47 | mmu-mir-411--5p                         | 10 |
| mmu-miR-140-5p   | 46 | mmu-mir-505--3p                         | 10 |
| mmu-miR-183-3p   | 46 | mmu-mir-5102--5p                        | 10 |
| mmu-miR-543-5p   | 46 | mmu-mir-5128--3p                        | 10 |
| mmu-miR-451      | 45 | mmu-mir-188--3p                         | 9  |
| mmu-miR-770-5p   | 45 | mmu-mir-26a-1--3p                       | 9  |
| mmu-miR-455-5p   | 43 | mmu-mir-27a--5p                         | 9  |
| mmu-miR-191-3p   | 42 | mmu-mir-297a-1--5p mmu-mir-297a-2--3p l | 9  |
| mmu-miR-1224-3p  | 40 | mmu-mir-3069--3p                        | 9  |
| mmu-miR-122-5p   | 39 | mmu-mir-331--5p                         | 9  |
| mmu-miR-3086-5p  | 39 | mmu-mir-381--3p                         | 9  |
| mmu-miR-802-3p   | 39 | mmu-mir-466b-1--3p mmu-mir-466b-2--3p l | 9  |
| mmu-miR-410-5p   | 38 | mmu-mir-467a-1--3p mmu-mir-467a-10--3p  | 9  |
| mmu-miR-494-3p   | 38 | mmu-mir-505--5p                         | 9  |
| mmu-miR-5099     | 37 | mmu-mir-139--5p                         | 8  |
| mmu-miR-362-3p   | 36 | mmu-mir-181b-1--3p                      | 8  |
| mmu-miR-29c-5p   | 35 | mmu-mir-190b--5p                        | 8  |
| mmu-miR-92a-1-5p | 35 | mmu-mir-1965--3p                        | 8  |
| mmu-miR-3072-5p  | 34 | mmu-mir-200b--5p                        | 8  |
| mmu-miR-134-3p   | 33 | mmu-mir-301b--5p                        | 8  |
| mmu-miR-1196-5p  | 32 | mmu-mir-3085--3p                        | 8  |
| mmu-miR-155-5p   | 32 | mmu-mir-3089--3p                        | 8  |
| mmu-miR-433-5p   | 32 | mmu-mir-470--5p                         | 8  |
| mmu-miR-667-5p   | 32 | mmu-mir-501--5p                         | 8  |
| mmu-miR-1968-5p  | 31 | mmu-mir-5117--5p                        | 8  |
| mmu-miR-365-3p   | 31 | mmu-mir-103-2--5p                       | 7  |
| mmu-miR-370-5p   | 31 | mmu-mir-1306--3p                        | 7  |
| mmu-miR-1247-5p  | 30 | mmu-mir-137--5p                         | 7  |
| mmu-miR-16-2-3p  | 30 | mmu-mir-181c--5p                        | 7  |
| mmu-miR-21-3p    | 29 | mmu-mir-182--3p                         | 7  |
| mmu-miR-29a-5p   | 29 | mmu-mir-1957--5p                        | 7  |
| mmu-miR-493-5p   | 29 | mmu-mir-200a--5p                        | 7  |
| mmu-miR-93-3p    | 29 | mmu-mir-208b--3p                        | 7  |
| mmu-miR-101c     | 28 | mmu-mir-3057--3p                        | 7  |
| mmu-miR-20a-5p   | 28 | mmu-mir-3470a--5p                       | 7  |
| mmu-miR-29b-2-5p | 28 | mmu-mir-652--5p                         | 7  |
| mmu-miR-3084-3p  | 28 | mmu-mir-879--3p                         | 7  |
| mmu-miR-455-3p   | 27 | mmu-mir-130a--5p                        | 6  |
| mmu-miR-15b-3p   | 26 | mmu-mir-136--3p                         | 6  |
| mmu-miR-199a-5p  | 26 | mmu-mir-185--3p                         | 6  |
| mmu-miR-744-3p   | 26 | mmu-mir-193b--3p                        | 6  |
| mmu-miR-187-5p   | 25 | mmu-mir-1943--5p                        | 6  |
| mmu-let-7g-3p    | 24 | mmu-mir-1945--3p                        | 6  |
| mmu-miR-194-1-3p | 24 | mmu-mir-297c--5p                        | 6  |

|                  |    |                                         |   |
|------------------|----|-----------------------------------------|---|
| mmu-miR-190b-5p  | 23 | mmu-mir-3061--5p                        | 6 |
| mmu-miR-133a-3p  | 22 | mmu-mir-326--3p                         | 6 |
| mmu-miR-223-3p   | 22 | mmu-mir-34a--3p                         | 6 |
| mmu-miR-702      | 22 | mmu-mir-409--3p                         | 6 |
| mmu-miR-19a-3p   | 21 | mmu-mir-467b--5p                        | 6 |
| mmu-miR-378b     | 21 | mmu-mir-5122--5p                        | 6 |
| mmu-miR-1191     | 20 | mmu-mir-874--5p                         | 6 |
| mmu-miR-214-3p   | 20 | mmu-mir-1251--5p                        | 5 |
| mmu-miR-341-5p   | 20 | mmu-mir-192--3p                         | 5 |
| mmu-miR-344d-3p  | 20 | mmu-mir-341--3p                         | 5 |
| mmu-miR-542-3p   | 20 | mmu-mir-342--5p                         | 5 |
| mmu-miR-704      | 20 | mmu-mir-344b--3p                        | 5 |
| mmu-miR-874-5p   | 20 | mmu-mir-3968--3p                        | 5 |
| mmu-miR-10a-3p   | 19 | mmu-mir-5113--5p                        | 5 |
| mmu-miR-143-5p   | 19 | mmu-mir-5126--3p                        | 5 |
| mmu-miR-296-3p   | 19 | mmu-mir-669e--3p                        | 5 |
| mmu-miR-3061-3p  | 19 | mmu-mir-669f--3p                        | 5 |
| mmu-miR-450a-5p  | 19 | mmu-mir-669m-1--3p mmu-mir-669m-2--3p   | 5 |
| mmu-miR-490-3p   | 19 | mmu-mir-99a--3p                         | 5 |
| mmu-miR-5102     | 19 | mmu-mir-1224--3p                        | 4 |
| mmu-miR-677-5p   | 19 | mmu-mir-147--3p                         | 4 |
| mmu-miR-758-3p   | 19 | mmu-mir-190--3p                         | 4 |
| mmu-miR-1955-5p  | 18 | mmu-mir-221--5p                         | 4 |
| mmu-miR-486-3p   | 18 | mmu-mir-300--3p                         | 4 |
| mmu-miR-592-5p   | 18 | mmu-mir-3069--5p                        | 4 |
| mmu-miR-135a-5p  | 17 | mmu-mir-3074-1--5p mmu-mir-3074-2--5p   | 4 |
| mmu-miR-205-3p   | 17 | mmu-mir-344f--3p                        | 4 |
| mmu-miR-210-5p   | 17 | mmu-mir-466a--5p                        | 4 |
| mmu-miR-216b-5p  | 17 | mmu-mir-466d--5p                        | 4 |
| mmu-miR-3060-3p  | 17 | mmu-mir-466h--3p                        | 4 |
| mmu-miR-31-3p    | 17 | mmu-mir-491--3p                         | 4 |
| mmu-miR-679-5p   | 17 | mmu-mir-497--3p                         | 4 |
| mmu-miR-760-3p   | 17 | mmu-mir-500--5p                         | 4 |
| mmu-miR-101a-5p  | 16 | mmu-mir-5114--5p                        | 4 |
| mmu-miR-33-3p    | 16 | mmu-mir-592--5p                         | 4 |
| mmu-miR-3470b    | 16 | mmu-mir-669p-1--5p mmu-mir-669p-2--5p   | 4 |
| mmu-miR-467d-5p  | 16 | mmu-mir-760--3p                         | 4 |
| mmu-miR-185-3p   | 15 | mmu-mir-873--5p                         | 4 |
| mmu-miR-216a-5p  | 15 | mmu-mir-92b--5p                         | 4 |
| mmu-miR-3076-3p  | 15 | mmu-mir-1843--3p                        | 3 |
| mmu-miR-412-3p   | 15 | mmu-mir-1929--5p                        | 3 |
| mmu-miR-124-3p   | 14 | mmu-mir-1950--5p                        | 3 |
| mmu-miR-200c-5p  | 14 | mmu-mir-1960--5p                        | 3 |
| mmu-miR-211-5p   | 14 | mmu-mir-199a-1--3p mmu-mir-199a-2--3p   | 3 |
| mmu-miR-26a-1-3p | 14 | mmu-mir-297a-3--3p mmu-mir-297a-4--3p   | 3 |
| mmu-miR-26a-2-3p | 14 | mmu-mir-3066--3p                        | 3 |
| mmu-miR-3087-3p  | 14 | mmu-mir-3092--3p                        | 3 |
| mmu-miR-690      | 14 | mmu-mir-3098--3p                        | 3 |
| mmu-miR-380-5p   | 13 | mmu-mir-351--5p                         | 3 |
| mmu-miR-154-3p   | 12 | mmu-mir-378b--3p                        | 3 |
| mmu-miR-17-3p    | 12 | mmu-mir-466f-1--5p mmu-mir-466f-2--5p m | 3 |
| mmu-miR-1933-3p  | 12 | mmu-mir-466l--3p                        | 3 |
| mmu-miR-3074-5p  | 12 | mmu-mir-466n--5p                        | 3 |
| mmu-miR-331-5p   | 12 | mmu-mir-598--5p                         | 3 |
| mmu-miR-3572     | 12 | mmu-mir-669o--3p                        | 3 |
| mmu-miR-25-5p    | 11 | mmu-mir-704--3p                         | 3 |
| mmu-miR-326-3p   | 11 | mmu-mir-881--3p                         | 3 |
| mmu-miR-3970     | 11 | mmu-mir-103-1--5p                       | 2 |
| mmu-miR-1188-5p  | 10 | mmu-mir-107--5p                         | 2 |
| mmu-miR-138-2-3p | 10 | mmu-mir-1195--5p                        | 2 |
| mmu-miR-467a-5p  | 10 | mmu-mir-1199--3p                        | 2 |
| mmu-miR-493-3p   | 10 | mmu-mir-122--3p                         | 2 |
| mmu-miR-5121     | 10 | mmu-mir-134--5p                         | 2 |

|                   |   |                                       |   |
|-------------------|---|---------------------------------------|---|
| mmu-miR-1194      | 9 | mmu-mir-146b--3p                      | 2 |
| mmu-miR-144-5p    | 9 | mmu-mir-187--5p                       | 2 |
| mmu-miR-194-2-3p  | 9 | mmu-mir-1930--5p                      | 2 |
| mmu-miR-204-3p    | 9 | mmu-mir-1930--3p                      | 2 |
| mmu-miR-28c       | 9 | mmu-mir-1934--3p                      | 2 |
| mmu-miR-5105      | 9 | mmu-mir-194-2--3p                     | 2 |
| mmu-miR-674-5p    | 9 | mmu-mir-1955--5p                      | 2 |
| mmu-miR-10b-3p    | 8 | mmu-mir-1969--5p                      | 2 |
| mmu-miR-18a-5p    | 8 | mmu-mir-199b--3p                      | 2 |
| mmu-miR-216a-3p   | 8 | mmu-mir-1b--3p                        | 2 |
| mmu-miR-23b-5p    | 8 | mmu-mir-215--3p                       | 2 |
| mmu-miR-3084-5p   | 8 | mmu-mir-218-1--5p mmu-mir-218-2--5p   | 2 |
| mmu-miR-382-3p    | 8 | mmu-mir-297a-5--3p                    | 2 |
| mmu-miR-450b-5p   | 8 | mmu-mir-297b--3p                      | 2 |
| mmu-miR-544-3p    | 8 | mmu-mir-3064--3p                      | 2 |
| mmu-miR-1198-3p   | 7 | mmu-mir-3067--5p                      | 2 |
| mmu-miR-18a-3p    | 7 | mmu-mir-3078--3p                      | 2 |
| mmu-miR-301a-5p   | 7 | mmu-mir-3080--3p                      | 2 |
| mmu-miR-3068-5p   | 7 | mmu-mir-3080--5p                      | 2 |
| mmu-miR-3103-3p   | 7 | mmu-mir-3082--5p                      | 2 |
| mmu-miR-323-5p    | 7 | mmu-mir-3084--5p                      | 2 |
| mmu-miR-344c-3p   | 7 | mmu-mir-3088--3p                      | 2 |
| mmu-miR-3473      | 7 | mmu-mir-3103--3p                      | 2 |
| mmu-miR-362-5p    | 7 | mmu-mir-3108--5p                      | 2 |
| mmu-miR-363-3p    | 7 | mmu-mir-344g--5p                      | 2 |
| mmu-miR-669c-5p   | 7 | mmu-mir-3474--5p                      | 2 |
| mmu-miR-1231-3p   | 6 | mmu-mir-34c--5p                       | 2 |
| mmu-miR-135a-2-3p | 6 | mmu-mir-434--3p                       | 2 |
| mmu-miR-137-3p    | 6 | mmu-mir-466c-1--3p mmu-mir-466c-2--3p | 2 |
| mmu-miR-142-3p    | 6 | mmu-mir-466m--3p                      | 2 |
| mmu-miR-188-5p    | 6 | mmu-mir-467e--3p                      | 2 |
| mmu-miR-190-5p    | 6 | mmu-mir-499--5p                       | 2 |
| mmu-miR-1960      | 6 | mmu-mir-615--3p                       | 2 |
| mmu-miR-3064-5p   | 6 | mmu-mir-669i--3p                      | 2 |
| mmu-miR-383-3p    | 6 | mmu-mir-669p-1--3p mmu-mir-669p-2--3p | 2 |
| mmu-miR-501-5p    | 6 | mmu-mir-701--5p                       | 2 |
| mmu-miR-503-3p    | 6 | mmu-mir-802--3p                       | 2 |
| mmu-miR-669a-3p   | 6 | mmu-mir-871--3p                       | 2 |
| mmu-miR-670-5p    | 6 | mmu-mir-101c--3p                      | 2 |
| mmu-miR-144-3p    | 5 | mmu-mir-5132--3p                      | 2 |
| mmu-miR-146b-3p   | 5 | mmu-let-7c-1--3p                      | 1 |
| mmu-miR-1927      | 5 | mmu-mir-101b--5p                      | 1 |
| mmu-miR-1934-5p   | 5 | mmu-mir-1198--3p                      | 1 |
| mmu-miR-20a-3p    | 5 | mmu-mir-128-2--5p                     | 1 |
| mmu-miR-29b-1-5p  | 5 | mmu-mir-1306--5p                      | 1 |
| mmu-miR-3061-5p   | 5 | mmu-mir-142--5p                       | 1 |
| mmu-miR-3066-5p   | 5 | mmu-mir-144--5p                       | 1 |
| mmu-miR-3077-3p   | 5 | mmu-mir-150--5p                       | 1 |
| mmu-miR-3089-3p   | 5 | mmu-mir-181d--5p                      | 1 |
| mmu-miR-3470a     | 5 | mmu-mir-190b--3p                      | 1 |
| mmu-miR-466b-3p   | 5 | mmu-mir-1927--3p                      | 1 |
| mmu-miR-494-5p    | 5 | mmu-mir-194-1--3p                     | 1 |
| mmu-miR-5113      | 5 | mmu-mir-1941--3p                      | 1 |
| mmu-miR-668-5p    | 5 | mmu-mir-1943--3p                      | 1 |
| mmu-miR-679-3p    | 5 | mmu-mir-1953--5p                      | 1 |
| mmu-miR-1199-5p   | 4 | mmu-mir-1955--3p                      | 1 |
| mmu-miR-1231-5p   | 4 | mmu-mir-199a-1--5p mmu-mir-199a-2--5p | 1 |
| mmu-miR-138-1-3p  | 4 | mmu-mir-201--5p                       | 1 |
| mmu-miR-147-3p    | 4 | mmu-mir-203--5p                       | 1 |
| mmu-miR-182-3p    | 4 | mmu-mir-205--5p                       | 1 |
| mmu-miR-1948-3p   | 4 | mmu-mir-218-1--3p                     | 1 |
| mmu-miR-1983      | 4 | mmu-mir-224--5p                       | 1 |
| mmu-miR-201-5p    | 4 | mmu-mir-28c--3p                       | 1 |

|                   |   |                                       |   |
|-------------------|---|---------------------------------------|---|
| mmu-miR-203-5p    | 4 | mmu-mir-294--3p                       | 1 |
| mmu-miR-214-5p    | 4 | mmu-mir-295--3p                       | 1 |
| mmu-miR-344b-3p   | 4 | mmu-mir-298--3p                       | 1 |
| mmu-miR-3473b     | 4 | mmu-mir-3062--5p                      | 1 |
| mmu-miR-488-5p    | 4 | mmu-mir-3064--5p                      | 1 |
| mmu-miR-5122      | 4 | mmu-mir-3075--5p                      | 1 |
| mmu-miR-873-5p    | 4 | mmu-mir-3081--3p                      | 1 |
| mmu-miR-92b-5p    | 4 | mmu-mir-3099--5p                      | 1 |
| mmu-miR-16-1-3p   | 3 | mmu-mir-3104--3p                      | 1 |
| mmu-miR-181b-1-3p | 3 | mmu-mir-3112--5p                      | 1 |
| mmu-miR-184-5p    | 3 | mmu-mir-328--5p                       | 1 |
| mmu-miR-186-3p    | 3 | mmu-mir-344e--3p                      | 1 |
| mmu-miR-188-3p    | 3 | mmu-mir-344f--5p                      | 1 |
| mmu-miR-1945      | 3 | mmu-mir-3572--3p                      | 1 |
| mmu-miR-1948-5p   | 3 | mmu-mir-365-2--3p                     | 1 |
| mmu-miR-219-5p    | 3 | mmu-mir-369--3p                       | 1 |
| mmu-miR-300-5p    | 3 | mmu-mir-369--5p                       | 1 |
| mmu-miR-3080-5p   | 3 | mmu-mir-374c--5p                      | 1 |
| mmu-miR-3083-5p   | 3 | mmu-mir-376c--3p                      | 1 |
| mmu-miR-3087-5p   | 3 | mmu-mir-379--5p                       | 1 |
| mmu-miR-3103-5p   | 3 | mmu-mir-380--3p                       | 1 |
| mmu-miR-3104-3p   | 3 | mmu-mir-382--5p                       | 1 |
| mmu-miR-3110-5p   | 3 | mmu-mir-429--5p                       | 1 |
| mmu-miR-3968      | 3 | mmu-mir-448--3p                       | 1 |
| mmu-miR-466g      | 3 | mmu-mir-449a--5p                      | 1 |
| mmu-miR-466h-3p   | 3 | mmu-mir-463--5p                       | 1 |
| mmu-miR-467e-5p   | 3 | mmu-mir-465b-1--5p mmu-mir-465b-2--5p | 1 |
| mmu-miR-488-3p    | 3 | mmu-mir-465c-1--5p mmu-mir-465c-2--5p | 1 |
| mmu-miR-490-5p    | 3 | mmu-mir-466a--3p                      | 1 |
| mmu-miR-496-5p    | 3 | mmu-mir-466e--3p                      | 1 |
| mmu-miR-5132      | 3 | mmu-mir-466e--5p                      | 1 |
| mmu-miR-541-3p    | 3 | mmu-mir-466p--3p                      | 1 |
| mmu-miR-542-5p    | 3 | mmu-mir-466p--5p                      | 1 |
| mmu-miR-5709      | 3 | mmu-mir-466q--3p                      | 1 |
| mmu-miR-669a-5p   | 3 | mmu-mir-467c--3p                      | 1 |
| mmu-miR-669l-5p   | 3 | mmu-mir-467d--3p                      | 1 |
| mmu-miR-96-3p     | 3 | mmu-mir-491--5p                       | 1 |
| mmu-let-7c-1-3p   | 2 | mmu-mir-5119--3p                      | 1 |
| mmu-miR-1197-3p   | 2 | mmu-mir-5134--5p                      | 1 |
| mmu-miR-1247-3p   | 2 | mmu-mir-547--3p                       | 1 |
| mmu-miR-1306-3p   | 2 | mmu-mir-668--3p                       | 1 |
| mmu-miR-150-3p    | 2 | mmu-mir-669b--3p                      | 1 |
| mmu-miR-15a-3p    | 2 | mmu-mir-669c--3p                      | 1 |
| mmu-miR-1892      | 2 | mmu-mir-669h--5p                      | 1 |
| mmu-miR-190-3p    | 2 | mmu-mir-672--3p                       | 1 |
| mmu-miR-192-3p    | 2 | mmu-mir-873--3p                       | 1 |
| mmu-miR-1930-5p   | 2 | mmu-mir-880--3p                       | 1 |
| mmu-miR-193b-3p   | 2 | mmu-mir-96--3p                        | 1 |
| mmu-miR-1940      | 2 | mmu-mir-184--5p                       | 1 |
| mmu-miR-1955-3p   | 2 | mmu-mir-1935--3p                      | 1 |
| mmu-miR-20b-5p    | 2 | mmu-mir-1938--3p                      | 1 |
| mmu-miR-217-3p    | 2 | mmu-mir-1969--3p                      | 1 |
| mmu-miR-297a-3p   | 2 | mmu-mir-3470b--3p                     | 1 |
| mmu-miR-298-3p    | 2 | mmu-mir-3473d--3p                     | 1 |
| mmu-miR-3057-3p   | 2 | mmu-mir-5098--3p                      | 1 |
| mmu-miR-3058-5p   | 2 | mmu-mir-5128--5p                      | 1 |
| mmu-miR-3070a-5p  | 2 | mmu-mir-5133--3p                      | 1 |
| mmu-miR-3070b-5p  | 2 | mmu-mir-5134--3p                      | 1 |
| mmu-miR-3074-1-3p | 2 | mmu-mir-669d-2--3p                    | 1 |
| mmu-miR-3088-3p   | 2 | mmu-mir-669j--5p                      | 1 |
| mmu-miR-3098-3p   | 2 | mmu-mir-686--3p                       | 1 |
| mmu-miR-3098-5p   | 2 | mmu-mir-100--5p                       | 0 |
| mmu-miR-3102-5p   | 2 | mmu-mir-1186--5p                      | 0 |

|                  |   |                                       |   |
|------------------|---|---------------------------------------|---|
| mmu-miR-32-3p    | 2 | mmu-mir-1187--3p                      | 0 |
| mmu-miR-33-5p    | 2 | mmu-mir-1298--5p                      | 0 |
| mmu-miR-421-5p   | 2 | mmu-mir-133a-1--3p mmu-mir-133a-2--3p | 0 |
| mmu-miR-450b-3p  | 2 | mmu-mir-135a-2--3p                    | 0 |
| mmu-miR-466d-3p  | 2 | mmu-mir-136--5p                       | 0 |
| mmu-miR-467a-3p  | 2 | mmu-mir-139--3p                       | 0 |
| mmu-miR-467c-5p  | 2 | mmu-mir-142--3p                       | 0 |
| mmu-miR-483-5p   | 2 | mmu-mir-144--3p                       | 0 |
| mmu-miR-495-5p   | 2 | mmu-mir-155--5p                       | 0 |
| mmu-miR-499-5p   | 2 | mmu-mir-181c--3p                      | 0 |
| mmu-miR-5101     | 2 | mmu-mir-193--3p                       | 0 |
| mmu-miR-5615-5p  | 2 | mmu-mir-1932--3p                      | 0 |
| mmu-miR-5627-3p  | 2 | mmu-mir-1933--5p                      | 0 |
| mmu-miR-598-5p   | 2 | mmu-mir-1936--3p                      | 0 |
| mmu-miR-669o-5p  | 2 | mmu-mir-1940--5p                      | 0 |
| mmu-miR-701-3p   | 2 | mmu-mir-1949--3p                      | 0 |
| mmu-miR-714      | 2 | mmu-mir-1951--3p                      | 0 |
| mmu-miR-9-3p     | 2 | mmu-mir-1956--5p                      | 0 |
| mmu-miR-99a-3p   | 2 | mmu-mir-1958--3p                      | 0 |
| mmu-let-7a-2-3p  | 1 | mmu-mir-1964--5p                      | 0 |
| mmu-miR-100-3p   | 1 | mmu-mir-1966--5p                      | 0 |
| mmu-miR-107-5p   | 1 | mmu-mir-1968--3p                      | 0 |
| mmu-miR-1195     | 1 | mmu-mir-196a-2--5p                    | 0 |
| mmu-miR-1298-5p  | 1 | mmu-mir-196b--5p                      | 0 |
| mmu-miR-130a-5p  | 1 | mmu-mir-1970--5p                      | 0 |
| mmu-miR-139-3p   | 1 | mmu-mir-199b--5p                      | 0 |
| mmu-miR-153-5p   | 1 | mmu-mir-19b-2--3p                     | 0 |
| mmu-miR-1929-5p  | 1 | mmu-mir-1b--5p                        | 0 |
| mmu-miR-193-3p   | 1 | mmu-mir-201--3p                       | 0 |
| mmu-miR-193-5p   | 1 | mmu-mir-211--5p                       | 0 |
| mmu-miR-1932     | 1 | mmu-mir-222--5p                       | 0 |
| mmu-miR-1949     | 1 | mmu-mir-23a--5p                       | 0 |
| mmu-miR-1957     | 1 | mmu-mir-23b--5p                       | 0 |
| mmu-miR-1968-3p  | 1 | mmu-mir-291a--5p                      | 0 |
| mmu-miR-196a-5p  | 1 | mmu-mir-297c--3p                      | 0 |
| mmu-miR-196b-5p  | 1 | mmu-mir-299--5p                       | 0 |
| mmu-miR-1970     | 1 | mmu-mir-302b--3p                      | 0 |
| mmu-miR-219-2-3p | 1 | mmu-mir-3058--5p                      | 0 |
| mmu-miR-23a-5p   | 1 | mmu-mir-3058--3p                      | 0 |
| mmu-miR-28b      | 1 | mmu-mir-3065--5p                      | 0 |
| mmu-miR-297b-3p  | 1 | mmu-mir-3067--3p                      | 0 |
| mmu-miR-297c-3p  | 1 | mmu-mir-3076--3p                      | 0 |
| mmu-miR-299b-3p  | 1 | mmu-mir-3076--5p                      | 0 |
| mmu-miR-3069-3p  | 1 | mmu-mir-3077--3p                      | 0 |
| mmu-miR-3069-5p  | 1 | mmu-mir-3083--5p                      | 0 |
| mmu-miR-3070b-3p | 1 | mmu-mir-3086--3p                      | 0 |
| mmu-miR-3079-5p  | 1 | mmu-mir-3086--5p                      | 0 |
| mmu-miR-3083-3p  | 1 | mmu-mir-3087--3p                      | 0 |
| mmu-miR-3085-3p  | 1 | mmu-mir-3087--5p                      | 0 |
| mmu-miR-3086-3p  | 1 | mmu-mir-3091--3p                      | 0 |
| mmu-miR-3091-3p  | 1 | mmu-mir-3091--5p                      | 0 |
| mmu-miR-3099-5p  | 1 | mmu-mir-3095--3p                      | 0 |
| mmu-miR-3107-3p  | 1 | mmu-mir-3096--3p                      | 0 |
| mmu-miR-3109-3p  | 1 | mmu-mir-3101--5p                      | 0 |
| mmu-miR-328-5p   | 1 | mmu-mir-3101--3p                      | 0 |
| mmu-miR-344e-3p  | 1 | mmu-mir-3102--5p                      | 0 |
| mmu-miR-344g-3p  | 1 | mmu-mir-3109--5p                      | 0 |
| mmu-miR-3473d    | 1 | mmu-mir-3110--5p                      | 0 |
| mmu-miR-351-3p   | 1 | mmu-mir-3113--5p                      | 0 |
| mmu-miR-376c-5p  | 1 | mmu-mir-320--5p                       | 0 |
| mmu-miR-3964     | 1 | mmu-mir-322--5p                       | 0 |
| mmu-miR-463-5p   | 1 | mmu-mir-329--5p                       | 0 |
| mmu-miR-466a-3p  | 1 | mmu-mir-344-1--5p                     | 0 |

|                   |   |                                       |   |
|-------------------|---|---------------------------------------|---|
| mmu-miR-466c-3p   | 1 | mmu-mir-344d-1--5p                    | 0 |
| mmu-miR-466e-3p   | 1 | mmu-mir-344g--3p                      | 0 |
| mmu-miR-466f-3p   | 1 | mmu-mir-3471-1--5p                    | 0 |
| mmu-miR-466h-5p   | 1 | mmu-mir-376b--5p                      | 0 |
| mmu-miR-466p-3p   | 1 | mmu-mir-377--3p                       | 0 |
| mmu-miR-466q      | 1 | mmu-mir-379--3p                       | 0 |
| mmu-miR-467b-5p   | 1 | mmu-mir-3970--5p                      | 0 |
| mmu-miR-467h      | 1 | mmu-mir-411--3p                       | 0 |
| mmu-miR-470-5p    | 1 | mmu-mir-449a--3p                      | 0 |
| mmu-miR-483-3p    | 1 | mmu-mir-450b--5p                      | 0 |
| mmu-miR-497-3p    | 1 | mmu-mir-451--5p                       | 0 |
| mmu-miR-504-5p    | 1 | mmu-mir-465a--5p                      | 0 |
| mmu-miR-505-3p    | 1 | mmu-mir-465c-2--3p                    | 0 |
| mmu-miR-5100      | 1 | mmu-mir-466b-1--5p mmu-mir-466b-2--5p | 0 |
| mmu-miR-5107      | 1 | mmu-mir-466i--5p                      | 0 |
| mmu-miR-511-5p    | 1 | mmu-mir-466j--3p                      | 0 |
| mmu-miR-5114      | 1 | mmu-mir-466k--5p                      | 0 |
| mmu-miR-5117-5p   | 1 | mmu-mir-466l--5p                      | 0 |
| mmu-miR-5119      | 1 | mmu-mir-466m--5p                      | 0 |
| mmu-miR-5126      | 1 | mmu-mir-466o--3p                      | 0 |
| mmu-miR-5128      | 1 | mmu-mir-466o--5p                      | 0 |
| mmu-miR-5133      | 1 | mmu-mir-467b--3p                      | 0 |
| mmu-miR-539-3p    | 1 | mmu-mir-467f--3p                      | 0 |
| mmu-miR-544-5p    | 1 | mmu-mir-471--5p                       | 0 |
| mmu-miR-547-3p    | 1 | mmu-mir-486--3p                       | 0 |
| mmu-miR-5624-3p   | 1 | mmu-mir-494--3p                       | 0 |
| mmu-miR-615-3p    | 1 | mmu-mir-5097--3p                      | 0 |
| mmu-miR-615-5p    | 1 | mmu-mir-5100--3p                      | 0 |
| mmu-miR-669d-5p   | 1 | mmu-mir-5105--5p                      | 0 |
| mmu-miR-669e-5p   | 1 | mmu-mir-511--3p                       | 0 |
| mmu-miR-669f-3p   | 1 | mmu-mir-5116--5p                      | 0 |
| mmu-miR-669o-3p   | 1 | mmu-mir-5120--5p                      | 0 |
| mmu-miR-669p-5p   | 1 | mmu-mir-5123--3p mmu-mir-5123--5p     | 0 |
| mmu-miR-672-3p    | 1 | mmu-mir-5125--3p                      | 0 |
| mmu-miR-701-5p    | 1 | mmu-mir-5132--5p                      | 0 |
| mmu-miR-712-5p    | 1 | mmu-mir-666--3p                       | 0 |
| mmu-miR-101b-5p   | 0 | mmu-mir-666--5p                       | 0 |
| mmu-miR-103-1-5p  | 0 | mmu-mir-667--3p                       | 0 |
| mmu-miR-103-2-5p  | 0 | mmu-mir-669g--5p                      | 0 |
| mmu-miR-106a-3p   | 0 | mmu-mir-669k--5p                      | 0 |
| mmu-miR-106a-5p   | 0 | mmu-mir-669l--3p                      | 0 |
| mmu-miR-1186b     | 0 | mmu-mir-669m-1--5p mmu-mir-669m-2--5p | 0 |
| mmu-miR-1188-3p   | 0 | mmu-mir-673--5p                       | 0 |
| mmu-miR-122-3p    | 0 | mmu-mir-693--5p                       | 0 |
| mmu-miR-124-5p    | 0 | mmu-mir-701--3p                       | 0 |
| mmu-miR-1251-5p   | 0 | mmu-mir-702--3p                       | 0 |
| mmu-miR-1264-3p   | 0 | mmu-mir-709--3p                       | 0 |
| mmu-miR-1264-5p   | 0 | mmu-mir-712--5p                       | 0 |
| mmu-miR-128-2-5p  | 0 | mmu-mir-714--5p                       | 0 |
| mmu-miR-1298-3p   | 0 | mmu-mir-742--3p                       | 0 |
| mmu-miR-1306-5p   | 0 | mmu-mir-743a--3p                      | 0 |
| mmu-miR-133a-5p   | 0 | mmu-mir-743b--3p                      | 0 |
| mmu-miR-133b-3p   | 0 | mmu-mir-760--5p                       | 0 |
| mmu-miR-135a-1-3p | 0 | mmu-mir-878--5p                       | 0 |
| mmu-miR-135b-3p   | 0 | mmu-mir-9-1--3p                       | 0 |
| mmu-miR-135b-5p   | 0 | mmu-mir-92a-1--3p                     | 0 |
| mmu-miR-137-5p    | 0 | mmu-mir-1192--3p                      | 0 |
| mmu-miR-146a-3p   | 0 | mmu-mir-1951--5p                      | 0 |
| mmu-miR-155-3p    | 0 | mmu-mir-3470a--3p                     | 0 |
| mmu-miR-181a-2-3p | 0 | mmu-mir-3572--5p                      | 0 |
| mmu-miR-181b-2-3p | 0 | mmu-mir-466f-1--3p                    | 0 |
| mmu-miR-1893      | 0 | mmu-mir-466f-2--3p                    | 0 |
| mmu-miR-18b-5p    | 0 | mmu-mir-466q--5p                      | 0 |



|                  |   |                  |   |
|------------------|---|------------------|---|
| mmu-miR-190b-3p  | 0 | mmu-mir-5105--3p | 0 |
| mmu-miR-1912-3p  | 0 | mmu-mir-5125--5p | 0 |
| mmu-miR-1933-5p  | 0 | mmu-mir-5129--3p | 0 |
| mmu-miR-1934-3p  | 0 | mmu-mir-5131--5p | 0 |
| mmu-miR-1938     | 0 | mmu-mir-714--3p  | 0 |
| mmu-miR-193b-5p  | 0 |                  |   |
| mmu-miR-1941-3p  | 0 |                  |   |
| mmu-miR-1941-5p  | 0 |                  |   |
| mmu-miR-1943-3p  | 0 |                  |   |
| mmu-miR-1947-3p  | 0 |                  |   |
| mmu-miR-1950     | 0 |                  |   |
| mmu-miR-1953     | 0 |                  |   |
| mmu-miR-1954     | 0 |                  |   |
| mmu-miR-1956     | 0 |                  |   |
| mmu-miR-1958     | 0 |                  |   |
| mmu-miR-1965     | 0 |                  |   |
| mmu-miR-1966     | 0 |                  |   |
| mmu-miR-1969     | 0 |                  |   |
| mmu-miR-196b-3p  | 0 |                  |   |
| mmu-miR-1982-5p  | 0 |                  |   |
| mmu-miR-199b-5p  | 0 |                  |   |
| mmu-miR-19a-5p   | 0 |                  |   |
| mmu-miR-19b-1-5p | 0 |                  |   |
| mmu-miR-1a-1-5p  | 0 |                  |   |
| mmu-miR-1a-3p    | 0 |                  |   |
| mmu-miR-1b-3p    | 0 |                  |   |
| mmu-miR-1b-5p    | 0 |                  |   |
| mmu-miR-202-5p   | 0 |                  |   |
| mmu-miR-206-3p   | 0 |                  |   |
| mmu-miR-208b-3p  | 0 |                  |   |
| mmu-miR-211-3p   | 0 |                  |   |
| mmu-miR-2137     | 0 |                  |   |
| mmu-miR-216b-3p  | 0 |                  |   |
| mmu-miR-218-1-3p | 0 |                  |   |
| mmu-miR-218-2-3p | 0 |                  |   |
| mmu-miR-223-5p   | 0 |                  |   |
| mmu-miR-291a-5p  | 0 |                  |   |
| mmu-miR-292-3p   | 0 |                  |   |
| mmu-miR-292-5p   | 0 |                  |   |
| mmu-miR-293-3p   | 0 |                  |   |
| mmu-miR-293-5p   | 0 |                  |   |
| mmu-miR-294-3p   | 0 |                  |   |
| mmu-miR-295-3p   | 0 |                  |   |
| mmu-miR-297a-5p  | 0 |                  |   |
| mmu-miR-297b-5p  | 0 |                  |   |
| mmu-miR-301b-5p  | 0 |                  |   |
| mmu-miR-302a-3p  | 0 |                  |   |
| mmu-miR-302d-3p  | 0 |                  |   |
| mmu-miR-3058-3p  | 0 |                  |   |
| mmu-miR-3059-3p  | 0 |                  |   |
| mmu-miR-3059-5p  | 0 |                  |   |
| mmu-miR-3064-3p  | 0 |                  |   |
| mmu-miR-3065-3p  | 0 |                  |   |
| mmu-miR-3065-5p  | 0 |                  |   |
| mmu-miR-3067-3p  | 0 |                  |   |
| mmu-miR-3067-5p  | 0 |                  |   |
| mmu-miR-3070a-3p | 0 |                  |   |
| mmu-miR-3073-3p  | 0 |                  |   |
| mmu-miR-3073-5p  | 0 |                  |   |
| mmu-miR-3073b-3p | 0 |                  |   |
| mmu-miR-3073b-5p | 0 |                  |   |
| mmu-miR-3075-5p  | 0 |                  |   |
| mmu-miR-3076-5p  | 0 |                  |   |

|                   |   |
|-------------------|---|
| mmu-miR-3078-3p   | 0 |
| mmu-miR-3078-5p   | 0 |
| mmu-miR-3080-3p   | 0 |
| mmu-miR-3081-3p   | 0 |
| mmu-miR-3082-5p   | 0 |
| mmu-miR-3088-5p   | 0 |
| mmu-miR-3090-3p   | 0 |
| mmu-miR-3092-3p   | 0 |
| mmu-miR-3093-3p   | 0 |
| mmu-miR-3093-5p   | 0 |
| mmu-miR-3094-5p   | 0 |
| mmu-miR-3095-3p   | 0 |
| mmu-miR-3095-5p   | 0 |
| mmu-miR-3096-3p   | 0 |
| mmu-miR-3097-3p   | 0 |
| mmu-miR-3097-5p   | 0 |
| mmu-miR-3100-5p   | 0 |
| mmu-miR-3105-3p   | 0 |
| mmu-miR-3105-5p   | 0 |
| mmu-miR-3106-5p   | 0 |
| mmu-miR-3112-3p   | 0 |
| mmu-miR-3112-5p   | 0 |
| mmu-miR-320-5p    | 0 |
| mmu-miR-344d-1-5p | 0 |
| mmu-miR-344d-3-5p | 0 |
| mmu-miR-344f-3p   | 0 |
| mmu-miR-344f-5p   | 0 |
| mmu-miR-344g-5p   | 0 |
| mmu-miR-344i      | 0 |
| mmu-miR-346-5p    | 0 |
| mmu-miR-3471      | 0 |
| mmu-miR-3474      | 0 |
| mmu-miR-3475      | 0 |
| mmu-miR-34a-3p    | 0 |
| mmu-miR-3544-3p   | 0 |
| mmu-miR-363-5p    | 0 |
| mmu-miR-365-1-5p  | 0 |
| mmu-miR-365-2-5p  | 0 |
| mmu-miR-374c-3p   | 0 |
| mmu-miR-381-5p    | 0 |
| mmu-miR-3960      | 0 |
| mmu-miR-3962      | 0 |
| mmu-miR-3965      | 0 |
| mmu-miR-3966      | 0 |
| mmu-miR-3969      | 0 |
| mmu-miR-448-3p    | 0 |
| mmu-miR-448-5p    | 0 |
| mmu-miR-449a-5p   | 0 |
| mmu-miR-449b      | 0 |
| mmu-miR-450a-1-3p | 0 |
| mmu-miR-450a-2-3p | 0 |
| mmu-miR-452-5p    | 0 |
| mmu-miR-465a-3p   | 0 |
| mmu-miR-465a-5p   | 0 |
| mmu-miR-465b-3p   | 0 |
| mmu-miR-465b-5p   | 0 |
| mmu-miR-465c-3p   | 0 |
| mmu-miR-465c-5p   | 0 |
| mmu-miR-466a-5p   | 0 |
| mmu-miR-466b-5p   | 0 |
| mmu-miR-466c-5p   | 0 |
| mmu-miR-466d-5p   | 0 |
| mmu-miR-466e-5p   | 0 |

|                   |   |
|-------------------|---|
| mmu-miR-466f-5p   | 0 |
| mmu-miR-466i-5p   | 0 |
| mmu-miR-466k      | 0 |
| mmu-miR-466m-3p   | 0 |
| mmu-miR-466n-3p   | 0 |
| mmu-miR-466n-5p   | 0 |
| mmu-miR-466o-5p   | 0 |
| mmu-miR-466p-5p   | 0 |
| mmu-miR-467c-3p   | 0 |
| mmu-miR-467d-3p   | 0 |
| mmu-miR-467e-3p   | 0 |
| mmu-miR-487b-5p   | 0 |
| mmu-miR-489-3p    | 0 |
| mmu-miR-491-3p    | 0 |
| mmu-miR-491-5p    | 0 |
| mmu-miR-499-3p    | 0 |
| mmu-miR-500-5p    | 0 |
| mmu-miR-503-5p    | 0 |
| mmu-miR-504-3p    | 0 |
| mmu-miR-505-5p    | 0 |
| mmu-miR-5097      | 0 |
| mmu-miR-5103      | 0 |
| mmu-miR-5104      | 0 |
| mmu-miR-511-3p    | 0 |
| mmu-miR-5116      | 0 |
| mmu-miR-5117-3p   | 0 |
| mmu-miR-5120      | 0 |
| mmu-miR-5123      | 0 |
| mmu-miR-5124      | 0 |
| mmu-miR-5125      | 0 |
| mmu-miR-5129      | 0 |
| mmu-miR-5130      | 0 |
| mmu-miR-5134      | 0 |
| mmu-miR-547-5p    | 0 |
| mmu-miR-551b-3p   | 0 |
| mmu-miR-551b-5p   | 0 |
| mmu-miR-5615-3p   | 0 |
| mmu-miR-5617-3p   | 0 |
| mmu-miR-5617-5p   | 0 |
| mmu-miR-5619-3p   | 0 |
| mmu-miR-5620-3p   | 0 |
| mmu-miR-5620-5p   | 0 |
| mmu-miR-5621-3p   | 0 |
| mmu-miR-5623-3p   | 0 |
| mmu-miR-5624-5p   | 0 |
| mmu-miR-5625-5p   | 0 |
| mmu-miR-5626-3p   | 0 |
| mmu-miR-5626-5p   | 0 |
| mmu-miR-5710      | 0 |
| mmu-miR-652-5p    | 0 |
| mmu-miR-665-5p    | 0 |
| mmu-miR-669a-3-3p | 0 |
| mmu-miR-669b-5p   | 0 |
| mmu-miR-669f-5p   | 0 |
| mmu-miR-669h-5p   | 0 |
| mmu-miR-669k-5p   | 0 |
| mmu-miR-692       | 0 |
| mmu-miR-693-3p    | 0 |
| mmu-miR-694       | 0 |
| mmu-miR-709       | 0 |
| mmu-miR-741-3p    | 0 |
| mmu-miR-743a-5p   | 0 |
| mmu-miR-743b-3p   | 0 |

|                 |   |
|-----------------|---|
| mmu-miR-760-5p  | 0 |
| mmu-miR-764-3p  | 0 |
| mmu-miR-764-5p  | 0 |
| mmu-miR-871-3p  | 0 |
| mmu-miR-871-5p  | 0 |
| mmu-miR-873-3p  | 0 |
| mmu-miR-876-5p  | 0 |
| mmu-miR-878-5p  | 0 |
| mmu-miR-881-3p  | 0 |
| mmu-miR-883b-5p | 0 |

Supplementary Table 2. Small RNA sequencing analysis after siRNA-knockdown of Dicer.

| mature miRNA    | siCtrl | siDcr1 | Ratio | FC   | Log2FC |
|-----------------|--------|--------|-------|------|--------|
| mmu-miR-375     | 488401 | 298083 | 0.49  | 0.61 | -0.71  |
| mmu-miR-182     | 104397 | 80257  | 0.26  | 0.77 | -0.38  |
| mmu-miR-30a     | 74275  | 49167  | 0.41  | 0.66 | -0.60  |
| mmu-miR-148a    | 52366  | 39194  | 0.29  | 0.75 | -0.42  |
| mmu-miR-22      | 31061  | 21016  | 0.39  | 0.68 | -0.56  |
| mmu-miR-340-5p  | 41386  | 24897  | 0.51  | 0.60 | -0.73  |
| mmu-miR-27b     | 29777  | 18244  | 0.49  | 0.61 | -0.71  |
| mmu-miR-30e     | 44125  | 33515  | 0.28  | 0.76 | -0.40  |
| mmu-miR-30d     | 31939  | 23347  | 0.31  | 0.73 | -0.45  |
| mmu-miR-191     | 26024  | 19085  | 0.31  | 0.73 | -0.45  |
| mmu-miR-26a     | 20248  | 14901  | 0.31  | 0.74 | -0.44  |
| mmu-miR-25      | 18412  | 12597  | 0.38  | 0.68 | -0.55  |
| mmu-let-7f      | 15884  | 11029  | 0.36  | 0.69 | -0.53  |
| mmu-let-7i      | 12610  | 7636   | 0.50  | 0.61 | -0.72  |
| mmu-miR-141     | 9333   | 6408   | 0.38  | 0.69 | -0.54  |
| mmu-miR-26b     | 9538   | 7031   | 0.30  | 0.74 | -0.44  |
| mmu-miR-301a    | 12806  | 8377   | 0.42  | 0.65 | -0.61  |
| mmu-let-7c      | 10283  | 7454   | 0.32  | 0.72 | -0.46  |
| mmu-miR-16      | 10040  | 6834   | 0.38  | 0.68 | -0.55  |
| mmu-miR-183     | 10743  | 6751   | 0.46  | 0.63 | -0.67  |
| mmu-miR-186     | 7867   | 6147   | 0.25  | 0.78 | -0.36  |
| mmu-miR-30b     | 7555   | 5763   | 0.27  | 0.76 | -0.39  |
| mmu-miR-378     | 6261   | 4362   | 0.36  | 0.70 | -0.52  |
| mmu-miR-21      | 8641   | 6176   | 0.34  | 0.71 | -0.48  |
| mmu-miR-29a     | 6313   | 4170   | 0.41  | 0.66 | -0.60  |
| mmu-let-7a      | 6247   | 4699   | 0.28  | 0.75 | -0.41  |
| mmu-miR-30c     | 8112   | 6846   | 0.17  | 0.84 | -0.24  |
| mmu-let-7b      | 7128   | 4731   | 0.41  | 0.66 | -0.59  |
| mmu-miR-93      | 7500   | 5422   | 0.32  | 0.72 | -0.47  |
| mmu-miR-148b    | 5828   | 4990   | 0.16  | 0.86 | -0.22  |
| mmu-miR-101a    | 5454   | 3208   | 0.53  | 0.59 | -0.77  |
| mmu-miR-125a-5p | 6445   | 5366   | 0.18  | 0.83 | -0.26  |
| mmu-miR-181a    | 5238   | 3453   | 0.42  | 0.66 | -0.60  |
| mmu-miR-99b     | 4807   | 3409   | 0.34  | 0.71 | -0.50  |
| mmu-miR-192     | 6256   | 3924   | 0.47  | 0.63 | -0.67  |
| mmu-let-7g      | 4479   | 3261   | 0.32  | 0.73 | -0.46  |
| mmu-miR-879     | 4741   | 2777   | 0.53  | 0.59 | -0.77  |
| mmu-miR-151-3p  | 3827   | 2479   | 0.43  | 0.65 | -0.63  |
| mmu-miR-106b    | 5084   | 3054   | 0.51  | 0.60 | -0.74  |
| mmu-miR-98      | 4472   | 2789   | 0.47  | 0.62 | -0.68  |
| mmu-miR-488     | 5415   | 3022   | 0.58  | 0.56 | -0.84  |
| mmu-miR-7a      | 4510   | 3582   | 0.23  | 0.79 | -0.33  |
| mmu-miR-101b    | 3448   | 2116   | 0.49  | 0.61 | -0.70  |
| mmu-miR-151-5p  | 2700   | 1902   | 0.35  | 0.70 | -0.51  |
| mmu-miR-138     | 2155   | 1166   | 0.61  | 0.54 | -0.89  |

|                  |      |      |      |      |       |
|------------------|------|------|------|------|-------|
| mmu-miR-200c     | 3339 | 2579 | 0.26 | 0.77 | -0.37 |
| mmu-miR-130a     | 2573 | 1751 | 0.38 | 0.68 | -0.56 |
| mmu-let-7d       | 2905 | 1813 | 0.47 | 0.62 | -0.68 |
| mmu-miR-140*     | 3497 | 2360 | 0.39 | 0.67 | -0.57 |
| mmu-miR-484      | 2839 | 1842 | 0.43 | 0.65 | -0.62 |
| mmu-miR-345-5p   | 3289 | 1924 | 0.54 | 0.58 | -0.77 |
| mmu-miR-384-3p   | 2459 | 1786 | 0.32 | 0.73 | -0.46 |
| mmu-miR-483*     | 2342 | 1679 | 0.33 | 0.72 | -0.48 |
| mmu-miR-342-3p   | 2522 | 1826 | 0.32 | 0.72 | -0.47 |
| mmu-miR-153      | 2397 | 1510 | 0.46 | 0.63 | -0.67 |
| mmu-miR-7a-2*    | 2078 | 1420 | 0.38 | 0.68 | -0.55 |
| mmu-miR-146b     | 2806 | 2476 | 0.13 | 0.88 | -0.18 |
| mmu-miR-872*     | 1441 | 905  | 0.47 | 0.63 | -0.67 |
| mmu-miR-421      | 1644 | 1040 | 0.46 | 0.63 | -0.66 |
| mmu-miR-130b     | 1838 | 1309 | 0.34 | 0.71 | -0.49 |
| mmu-miR-15b      | 2468 | 1863 | 0.28 | 0.75 | -0.41 |
| mmu-miR-103      | 2725 | 1471 | 0.62 | 0.54 | -0.89 |
| mmu-miR-423-3p   | 1462 | 1022 | 0.36 | 0.70 | -0.52 |
| mmu-miR-384-5p   | 1666 | 1183 | 0.34 | 0.71 | -0.49 |
| mmu-miR-331-3p   | 1770 | 1123 | 0.45 | 0.63 | -0.66 |
| mmu-miR-383      | 1500 | 903  | 0.51 | 0.60 | -0.73 |
| mmu-miR-29c      | 1320 | 859  | 0.43 | 0.65 | -0.62 |
| mmu-miR-23b      | 1414 | 1198 | 0.17 | 0.85 | -0.24 |
| mmu-miR-92b      | 1214 | 733  | 0.50 | 0.60 | -0.73 |
| mmu-miR-700*     | 1802 | 1340 | 0.30 | 0.74 | -0.43 |
| mmu-miR-7b       | 1665 | 1175 | 0.35 | 0.71 | -0.50 |
| mmu-miR-455*     | 1295 | 746  | 0.55 | 0.58 | -0.80 |
| mmu-miR-532-5p   | 1356 | 893  | 0.42 | 0.66 | -0.60 |
| mmu-miR-200b     | 1274 | 985  | 0.26 | 0.77 | -0.37 |
| mmu-miR-320      | 1111 | 890  | 0.22 | 0.80 | -0.32 |
| mmu-miR-455      | 1054 | 753  | 0.34 | 0.71 | -0.49 |
| mmu-miR-129-1-3p | 953  | 767  | 0.22 | 0.80 | -0.31 |
| mmu-miR-184      | 1025 | 796  | 0.25 | 0.78 | -0.36 |
| mmu-miR-325      | 1172 | 776  | 0.41 | 0.66 | -0.59 |
| mmu-miR-582-5p   | 1003 | 662  | 0.42 | 0.66 | -0.60 |
| mmu-miR-744      | 865  | 637  | 0.31 | 0.74 | -0.44 |
| mmu-let-7e       | 880  | 587  | 0.40 | 0.67 | -0.58 |
| mmu-let-7d*      | 1165 | 838  | 0.33 | 0.72 | -0.48 |
| mmu-miR-598      | 1248 | 684  | 0.60 | 0.55 | -0.87 |
| mmu-miR-423-5p   | 926  | 637  | 0.37 | 0.69 | -0.54 |
| mmu-miR-374      | 1041 | 707  | 0.39 | 0.68 | -0.56 |
| mmu-miR-129-5p   | 843  | 521  | 0.48 | 0.62 | -0.69 |
| mmu-miR-301b     | 1059 | 643  | 0.50 | 0.61 | -0.72 |
| mmu-miR-29b      | 1127 | 635  | 0.57 | 0.56 | -0.83 |
| mmu-miR-328      | 931  | 634  | 0.38 | 0.68 | -0.55 |
| mmu-miR-324-5p   | 1069 | 694  | 0.43 | 0.65 | -0.62 |
| mmu-miR-15b*     | 985  | 709  | 0.33 | 0.72 | -0.47 |

|                       |            |            |      |      |       |
|-----------------------|------------|------------|------|------|-------|
| mmu-miR-3099          | 828        | 614        | 0.30 | 0.74 | -0.43 |
| mmu-miR-30e*          | 909        | 641        | 0.35 | 0.71 | -0.50 |
| mmu-miR-195           | 756        | 541        | 0.33 | 0.72 | -0.48 |
| mmu-miR-5115          | 729        | 362        | 0.70 | 0.50 | -1.01 |
| mmu-miR-872           | 671        | 415        | 0.48 | 0.62 | -0.69 |
| mmu-miR-152*          | 842        | 543        | 0.44 | 0.64 | -0.63 |
| mmu-miR-181b          | 767        | 551        | 0.33 | 0.72 | -0.48 |
| mmu-miR-24            | <b>817</b> | <b>635</b> | 0.25 | 0.78 | -0.36 |
| mmu-miR-128           | 603        | 415        | 0.37 | 0.69 | -0.54 |
| mmu-miR-27a           | 741        | 475        | 0.44 | 0.64 | -0.64 |
| mmu-miR-361           | 640        | 427        | 0.40 | 0.67 | -0.58 |
| mmu-miR-1839-5p       | 755        | 495        | 0.42 | 0.66 | -0.61 |
| mmu-miR-425           | 753        | 577        | 0.27 | 0.77 | -0.38 |
| mmu-miR-344d          | 419        | 259        | 0.48 | 0.62 | -0.69 |
| mmu-miR-429           | 462        | 312        | 0.39 | 0.68 | -0.57 |
| mmu-miR-34a           | 806        | 620        | 0.26 | 0.77 | -0.38 |
| mmu-miR-132           | 542        | 334        | 0.48 | 0.62 | -0.70 |
| mmu-miR-15a           | 718        | 483        | 0.40 | 0.67 | -0.57 |
| mmu-miR-720           | 311        | 176        | 0.57 | 0.57 | -0.82 |
| mmu-miR-652           | 631        | 357        | 0.57 | 0.57 | -0.82 |
| mmu-miR-30a*          | 725        | 474        | 0.42 | 0.65 | -0.61 |
| mmu-miR-152           | 508        | 332        | 0.43 | 0.65 | -0.61 |
| mmu-miR-345-3p        | 637        | 391        | 0.49 | 0.61 | -0.70 |
| mmu-miR-338-3p        | 581        | 423        | 0.32 | 0.73 | -0.46 |
| mmu-miR-330           | 548        | 295        | 0.62 | 0.54 | -0.89 |
| mmu-let-7b*           | 661        | 375        | 0.57 | 0.57 | -0.82 |
| mmu-miR-106b*         | 463        | 293        | 0.46 | 0.63 | -0.66 |
| mmu-miR-344           | 549        | 341        | 0.48 | 0.62 | -0.69 |
| mmu-miR-708*          | 317        | 211        | 0.41 | 0.67 | -0.59 |
| mmu-miR-137           | 503        | 375        | 0.29 | 0.75 | -0.42 |
| mmu-miR-148a*         | 481        | 282        | 0.53 | 0.59 | -0.77 |
| mmu-miR-340-3p        | 453        | 319        | 0.35 | 0.70 | -0.51 |
| mmu-miR-32            | 471        | 333        | 0.35 | 0.71 | -0.50 |
| mmu-miR-200a          | 443        | 338        | 0.27 | 0.76 | -0.39 |
| mmu-miR-1198-5p       | 447        | 311        | 0.36 | 0.70 | -0.52 |
| mmu-miR-130b*         | 350        | 295        | 0.17 | 0.84 | -0.25 |
| novel_mmu-mir-3102-3p | 364        | 188        | 0.66 | 0.52 | -0.95 |
| mmu-miR-497           | 425        | 311        | 0.31 | 0.73 | -0.45 |
| mmu-miR-107           | 427        | 266        | 0.47 | 0.62 | -0.68 |
| mmu-miR-1224          | 541        | 342        | 0.46 | 0.63 | -0.66 |
| mmu-miR-339-5p        | 288        | 183        | 0.45 | 0.64 | -0.65 |
| mmu-miR-149           | 357        | 260        | 0.32 | 0.73 | -0.46 |
| mmu-miR-96            | 534        | 443        | 0.19 | 0.83 | -0.27 |
| mmu-miR-28            | 286        | 180        | 0.46 | 0.63 | -0.67 |
| mmu-miR-671-5p        | 328        | 202        | 0.48 | 0.62 | -0.70 |
| mmu-miR-181a-1*       | 293        | 224        | 0.27 | 0.76 | -0.39 |
| mmu-miR-671-3p        | 259        | 207        | 0.22 | 0.80 | -0.32 |

|                   |     |     |      |      |       |
|-------------------|-----|-----|------|------|-------|
| mmu-miR-210       | 367 | 217 | 0.53 | 0.59 | -0.76 |
| mmu-miR-488*      | 343 | 252 | 0.31 | 0.73 | -0.44 |
| mmu-miR-574-3p    | 246 | 155 | 0.46 | 0.63 | -0.67 |
| mmu-miR-700       | 332 | 205 | 0.48 | 0.62 | -0.70 |
| mmu-miR-361*      | 272 | 212 | 0.25 | 0.78 | -0.36 |
| mmu-miR-708       | 194 | 128 | 0.42 | 0.66 | -0.60 |
| mmu-miR-125b-5p   | 364 | 280 | 0.26 | 0.77 | -0.38 |
| mmu-miR-185       | 298 | 172 | 0.55 | 0.58 | -0.79 |
| mmu-miR-324-3p    | 322 | 156 | 0.72 | 0.48 | -1.05 |
| mmu-miR-669c      | 320 | 222 | 0.37 | 0.69 | -0.53 |
| mmu-miR-148b*     | 256 | 191 | 0.29 | 0.75 | -0.42 |
| mmu-miR-325*      | 291 | 167 | 0.56 | 0.57 | -0.80 |
| mmu-miR-467e      | 260 | 166 | 0.45 | 0.64 | -0.65 |
| mmu-miR-23a       | 246 | 187 | 0.27 | 0.76 | -0.40 |
| mmu-miR-350*      | 229 | 155 | 0.39 | 0.68 | -0.56 |
| mmu-miR-124       | 242 | 149 | 0.48 | 0.62 | -0.70 |
| mmu-miR-676       | 196 | 120 | 0.49 | 0.61 | -0.71 |
| mmu-miR-467d      | 189 | 119 | 0.46 | 0.63 | -0.67 |
| mmu-miR-298       | 236 | 123 | 0.65 | 0.52 | -0.94 |
| mmu-miR-574-5p    | 186 | 133 | 0.34 | 0.72 | -0.48 |
| mmu-miR-483       | 216 | 156 | 0.33 | 0.72 | -0.47 |
| mmu-miR-467c      | 187 | 155 | 0.19 | 0.83 | -0.27 |
| mmu-miR-30d*      | 237 | 116 | 0.71 | 0.49 | -1.03 |
| mmu-miR-140       | 210 | 139 | 0.41 | 0.66 | -0.60 |
| mmu-miR-1983      | 236 | 146 | 0.48 | 0.62 | -0.69 |
| mmu-miR-350       | 266 | 189 | 0.34 | 0.71 | -0.49 |
| mmu-miR-1249      | 174 | 157 | 0.10 | 0.90 | -0.15 |
| mmu-miR-1839-3p   | 204 | 120 | 0.53 | 0.59 | -0.77 |
| mmu-miR-16-2*     | 234 | 168 | 0.33 | 0.72 | -0.48 |
| mmu-miR-183*      | 168 | 96  | 0.56 | 0.57 | -0.81 |
| mmu-let-7c-2*     | 225 | 158 | 0.35 | 0.70 | -0.51 |
| mmu-miR-129-2-3p  | 122 | 110 | 0.10 | 0.90 | -0.15 |
| mmu-miR-532-3p    | 141 | 113 | 0.22 | 0.80 | -0.32 |
| mmu-let-7f-2*     | 201 | 126 | 0.47 | 0.63 | -0.67 |
| mmu-miR-22*       | 155 | 114 | 0.31 | 0.74 | -0.44 |
| mmu-miR-339-3p    | 109 | 60  | 0.60 | 0.55 | -0.86 |
| mmu-miR-670*      | 133 | 79  | 0.52 | 0.59 | -0.75 |
| mmu-miR-188-5p    | 141 | 87  | 0.48 | 0.62 | -0.70 |
| mmu-let-7a-1*     | 228 | 154 | 0.39 | 0.68 | -0.57 |
| mmu-miR-141*      | 149 | 110 | 0.30 | 0.74 | -0.44 |
| mmu-miR-212-3p    | 109 | 51  | 0.76 | 0.47 | -1.10 |
| mmu-miR-690       | 126 | 69  | 0.60 | 0.55 | -0.87 |
| mmu-miR-28*       | 177 | 115 | 0.43 | 0.65 | -0.62 |
| mmu-miR-16-1*     | 201 | 146 | 0.32 | 0.73 | -0.46 |
| mmu-miR-187       | 90  | 67  | 0.30 | 0.74 | -0.43 |
| mmu-miR-125b-2-3p | 131 | 78  | 0.52 | 0.60 | -0.75 |
| mmu-miR-7a-1*     | 129 | 92  | 0.34 | 0.71 | -0.49 |



|                       |     |     |       |      |       |
|-----------------------|-----|-----|-------|------|-------|
| mmu-let-7i*           | 155 | 85  | 0.60  | 0.55 | -0.87 |
| mmu-let-7f-1*         | 137 | 87  | 0.45  | 0.64 | -0.66 |
| mmu-miR-877           | 108 | 42  | 0.94  | 0.39 | -1.36 |
| mmu-miR-29a*          | 108 | 103 | 0.05  | 0.95 | -0.07 |
| mmu-miR-338-5p        | 82  | 74  | 0.10  | 0.90 | -0.15 |
| mmu-miR-99b*          | 127 | 82  | 0.44  | 0.65 | -0.63 |
| mmu-miR-3068*         | 121 | 79  | 0.43  | 0.65 | -0.62 |
| mmu-miR-1843-5p       | 82  | 59  | 0.33  | 0.72 | -0.47 |
| mmu-miR-677           | 94  | 77  | 0.20  | 0.82 | -0.29 |
| mmu-miR-99a           | 134 | 100 | 0.29  | 0.75 | -0.42 |
| mmu-miR-24-2*         | 109 | 83  | 0.27  | 0.76 | -0.39 |
| mmu-miR-378*          | 71  | 59  | 0.19  | 0.83 | -0.27 |
| mmu-miR-128-1*        | 106 | 75  | 0.35  | 0.71 | -0.50 |
| mmu-miR-3096-5p       | 70  | 35  | 0.69  | 0.50 | -1.00 |
| mmu-miR-669o-5p       | 108 | 88  | 0.20  | 0.81 | -0.30 |
| mmu-miR-874           | 97  | 66  | 0.39  | 0.68 | -0.56 |
| mmu-miR-98*           | 104 | 74  | 0.34  | 0.71 | -0.49 |
| novel_mmu-mir-5117-3p | 106 | 87  | 0.20  | 0.82 | -0.28 |
| mmu-miR-330*          | 119 | 48  | 0.91  | 0.40 | -1.31 |
| mmu-miR-212-5p        | 80  | 64  | 0.22  | 0.80 | -0.32 |
| mmu-miR-30c-2*        | 106 | 86  | 0.21  | 0.81 | -0.30 |
| mmu-miR-26b*          | 64  | 59  | 0.08  | 0.92 | -0.12 |
| mmu-miR-362-3p        | 83  | 53  | 0.45  | 0.64 | -0.65 |
| mmu-miR-5121          | 31  | 21  | 0.39  | 0.68 | -0.56 |
| mmu-miR-132*          | 61  | 33  | 0.61  | 0.54 | -0.89 |
| mmu-miR-190           | 107 | 73  | 0.38  | 0.68 | -0.55 |
| mmu-miR-194           | 78  | 57  | 0.31  | 0.73 | -0.45 |
| mmu-miR-195*          | 85  | 45  | 0.64  | 0.53 | -0.92 |
| mmu-miR-1843b-5p      | 90  | 44  | 0.72  | 0.49 | -1.03 |
| mmu-miR-3096b-5p      | 76  | 37  | 0.72  | 0.49 | -1.04 |
| mmu-miR-3068          | 90  | 91  | -0.01 | 1.01 | 0.02  |
| mmu-miR-501-3p        | 72  | 40  | 0.59  | 0.56 | -0.85 |
| mmu-miR-5109          | 461 | 57  | 2.09  | 0.12 | -3.02 |
| mmu-miR-29c*          | 101 | 65  | 0.44  | 0.64 | -0.64 |
| mmu-miR-301a*         | 73  | 28  | 0.96  | 0.38 | -1.38 |
| mmu-miR-1947          | 49  | 24  | 0.71  | 0.49 | -1.03 |
| mmu-miR-25*           | 79  | 60  | 0.28  | 0.76 | -0.40 |
| mmu-miR-24-1*         | 49  | 38  | 0.25  | 0.78 | -0.37 |
| mmu-miR-425*          | 83  | 63  | 0.28  | 0.76 | -0.40 |
| mmu-miR-744*          | 56  | 49  | 0.13  | 0.88 | -0.19 |
| mmu-miR-344d-3*       | 40  | 33  | 0.19  | 0.83 | -0.28 |
| mmu-miR-93*           | 69  | 51  | 0.30  | 0.74 | -0.44 |
| mmu-miR-221           | 69  | 56  | 0.21  | 0.81 | -0.30 |
| mmu-miR-467a          | 68  | 44  | 0.44  | 0.65 | -0.63 |
| mmu-let-7g*           | 77  | 51  | 0.41  | 0.66 | -0.59 |
| mmu-miR-219-3p*       | 49  | 36  | 0.31  | 0.73 | -0.44 |
| mmu-miR-466c-5p       | 81  | 50  | 0.48  | 0.62 | -0.70 |

|                        |    |    |       |      |       |
|------------------------|----|----|-------|------|-------|
| <b>mmu-miR-500</b>     | 76 | 47 | 0.48  | 0.62 | -0.69 |
| <b>mmu-miR-466g</b>    | 38 | 24 | 0.46  | 0.63 | -0.66 |
| <b>mmu-miR-669l</b>    | 47 | 33 | 0.35  | 0.70 | -0.51 |
| <b>mmu-miR-15a*</b>    | 86 | 43 | 0.69  | 0.50 | -1.00 |
| <b>mmu-miR-126-5p</b>  | 59 | 28 | 0.75  | 0.47 | -1.08 |
| <b>mmu-miR-215</b>     | 47 | 36 | 0.27  | 0.77 | -0.38 |
| <b>mmu-miR-3107</b>    | 64 | 45 | 0.35  | 0.70 | -0.51 |
| <b>mmu-miR-346</b>     | 77 | 51 | 0.41  | 0.66 | -0.59 |
| <b>mmu-miR-486</b>     | 65 | 45 | 0.37  | 0.69 | -0.53 |
| <b>mmu-miR-222</b>     | 42 | 30 | 0.34  | 0.71 | -0.49 |
| <b>mmu-miR-296-5p</b>  | 54 | 35 | 0.43  | 0.65 | -0.63 |
| <b>mmu-miR-3082-3p</b> | 53 | 34 | 0.44  | 0.64 | -0.64 |
| <b>mmu-miR-664</b>     | 63 | 56 | 0.12  | 0.89 | -0.17 |
| <b>mmu-miR-21*</b>     | 83 | 53 | 0.45  | 0.64 | -0.65 |
| <b>mmu-miR-466h-5p</b> | 49 | 40 | 0.20  | 0.82 | -0.29 |
| <b>mmu-miR-33</b>      | 52 | 29 | 0.58  | 0.56 | -0.84 |
| <b>mmu-miR-344c</b>    | 49 | 21 | 0.85  | 0.43 | -1.22 |
| <b>mmu-miR-7b*</b>     | 34 | 26 | 0.27  | 0.76 | -0.39 |
| <b>mmu-miR-204</b>     | 47 | 34 | 0.32  | 0.72 | -0.47 |
| <b>mmu-miR-27b*</b>    | 49 | 27 | 0.60  | 0.55 | -0.86 |
| <b>mmu-miR-3470b</b>   | 51 | 27 | 0.64  | 0.53 | -0.92 |
| <b>mmu-miR-122</b>     | 37 | 47 | -0.24 | 1.27 | 0.35  |
| <b>mmu-miR-5099</b>    | 26 | 20 | 0.26  | 0.77 | -0.38 |
| <b>mmu-miR-669d</b>    | 62 | 58 | 0.07  | 0.94 | -0.10 |
| <b>mmu-miR-33*</b>     | 39 | 26 | 0.41  | 0.67 | -0.58 |
| <b>mmu-miR-877*</b>    | 36 | 8  | 1.50  | 0.22 | -2.17 |
| <b>mmu-miR-101a*</b>   | 23 | 14 | 0.50  | 0.61 | -0.72 |
| <b>mmu-miR-143</b>     | 19 | 5  | 1.34  | 0.26 | -1.93 |
| <b>mmu-miR-3078</b>    | 39 | 14 | 1.02  | 0.36 | -1.48 |
| <b>mmu-miR-669a-3p</b> | 33 | 21 | 0.45  | 0.64 | -0.65 |
| <b>mmu-miR-3057-5p</b> | 18 | 11 | 0.49  | 0.61 | -0.71 |
| <b>mmu-miR-669f-5p</b> | 50 | 33 | 0.42  | 0.66 | -0.60 |
| <b>mmu-miR-676*</b>    | 35 | 29 | 0.19  | 0.83 | -0.27 |
| <b>mmu-miR-146a</b>    | 13 | 24 | -0.61 | 1.85 | 0.88  |
| <b>mmu-miR-383*</b>    | 38 | 19 | 0.69  | 0.50 | -1.00 |
| <b>mmu-miR-466d-3p</b> | 44 | 26 | 0.53  | 0.59 | -0.76 |
| <b>mmu-miR-125a-3p</b> | 36 | 15 | 0.88  | 0.42 | -1.26 |
| <b>mmu-miR-138-2*</b>  | 25 | 15 | 0.51  | 0.60 | -0.74 |
| <b>mmu-miR-26a-2*</b>  | 29 | 19 | 0.42  | 0.66 | -0.61 |
| <b>mmu-miR-3473d</b>   | 18 | 25 | -0.33 | 1.39 | 0.47  |
| <b>mmu-miR-362-5p</b>  | 25 | 15 | 0.51  | 0.60 | -0.74 |
| <b>mmu-miR-1968</b>    | 38 | 23 | 0.50  | 0.61 | -0.72 |
| <b>mmu-miR-541</b>     | 38 | 33 | 0.14  | 0.87 | -0.20 |
| <b>mmu-miR-669a-5p</b> | 34 | 23 | 0.39  | 0.68 | -0.56 |
| <b>mmu-miR-1194</b>    | 26 | 14 | 0.62  | 0.54 | -0.89 |
| <b>mmu-miR-186*</b>    | 32 | 18 | 0.58  | 0.56 | -0.83 |
| <b>mmu-miR-203</b>     | 11 | 2  | 1.70  | 0.18 | -2.46 |

|                   |    |    |       |      |       |
|-------------------|----|----|-------|------|-------|
| mmu-miR-30c-1*    | 20 | 20 | 0.00  | 1.00 | 0.00  |
| mmu-miR-32*       | 24 | 9  | 0.98  | 0.38 | -1.42 |
| mmu-miR-421*      | 19 | 4  | 1.56  | 0.21 | -2.25 |
| mmu-miR-10b       | 33 | 21 | 0.45  | 0.64 | -0.65 |
| mmu-miR-135a      | 10 | 7  | 0.36  | 0.70 | -0.51 |
| mmu-miR-191*      | 19 | 7  | 1.00  | 0.37 | -1.44 |
| mmu-miR-30b*      | 51 | 25 | 0.71  | 0.49 | -1.03 |
| mmu-miR-669e      | 57 | 28 | 0.71  | 0.49 | -1.03 |
| mmu-miR-10a       | 25 | 12 | 0.73  | 0.48 | -1.06 |
| mmu-miR-1199      | 16 | 11 | 0.37  | 0.69 | -0.54 |
| mmu-miR-127       | 22 | 12 | 0.61  | 0.55 | -0.87 |
| mmu-miR-1981*     | 32 | 13 | 0.90  | 0.41 | -1.30 |
| mmu-miR-297b-5p   | 35 | 10 | 1.25  | 0.29 | -1.81 |
| mmu-miR-410       | 16 | 14 | 0.13  | 0.88 | -0.19 |
| mmu-miR-802       | 11 | 7  | 0.45  | 0.64 | -0.65 |
| mmu-miR-1981      | 32 | 16 | 0.69  | 0.50 | -1.00 |
| mmu-miR-219-5p    | 37 | 25 | 0.39  | 0.68 | -0.57 |
| mmu-miR-3061-3p   | 13 | 12 | 0.08  | 0.92 | -0.12 |
| mmu-miR-3066      | 33 | 12 | 1.01  | 0.36 | -1.46 |
| mmu-miR-3084      | 12 | 7  | 0.54  | 0.58 | -0.78 |
| mmu-miR-1191      | 25 | 14 | 0.58  | 0.56 | -0.84 |
| mmu-miR-1196      | 5  | 4  | 0.22  | 0.80 | -0.32 |
| mmu-miR-1933-3p   | 8  | 3  | 0.98  | 0.38 | -1.42 |
| mmu-miR-2137      | 30 | 17 | 0.57  | 0.57 | -0.82 |
| mmu-miR-582-3p    | 31 | 20 | 0.44  | 0.65 | -0.63 |
| mmu-miR-669b      | 34 | 22 | 0.44  | 0.65 | -0.63 |
| mmu-miR-29b-2*    | 20 | 13 | 0.43  | 0.65 | -0.62 |
| mmu-miR-3074-1-3p | 22 | 15 | 0.38  | 0.68 | -0.55 |
| mmu-miR-3098-5p   | 15 | 6  | 0.92  | 0.40 | -1.32 |
| mmu-miR-3473b     | 14 | 3  | 1.54  | 0.21 | -2.22 |
| mmu-miR-375*      | 18 | 12 | 0.41  | 0.67 | -0.58 |
| mmu-miR-672       | 8  | 5  | 0.47  | 0.63 | -0.68 |
| mmu-miR-9         | 21 | 20 | 0.05  | 0.95 | -0.07 |
| mmu-miR-200c*     | 8  | 3  | 0.98  | 0.38 | -1.42 |
| mmu-miR-3096b-3p  | 10 | 4  | 0.92  | 0.40 | -1.32 |
| mmu-miR-664*      | 23 | 18 | 0.25  | 0.78 | -0.35 |
| mmu-miR-669a-3-3p | 15 | 4  | 1.32  | 0.27 | -1.91 |
| mmu-miR-1843b-3p  | 11 | 1  | 2.40  | 0.09 | -3.46 |
| mmu-miR-1964-3p   | 11 | 13 | -0.17 | 1.18 | 0.24  |
| mmu-miR-296-3p    | 14 | 7  | 0.69  | 0.50 | -1.00 |
| mmu-miR-3473      | 16 | 4  | 1.39  | 0.25 | -2.00 |
| mmu-miR-466n-3p   | 18 | 13 | 0.33  | 0.72 | -0.47 |
| mmu-miR-670       | 13 | 6  | 0.77  | 0.46 | -1.12 |
| mmu-let-7e*       | 29 | 19 | 0.42  | 0.66 | -0.61 |
| mmu-miR-124*      | 13 | 12 | 0.08  | 0.92 | -0.12 |
| mmu-miR-126-3p    | 9  | 11 | -0.20 | 1.22 | 0.29  |
| mmu-miR-1934      | 21 | 13 | 0.48  | 0.62 | -0.69 |

|                 |    |    |       |      |       |
|-----------------|----|----|-------|------|-------|
| mmu-miR-210*    | 24 | 5  | 1.57  | 0.21 | -2.26 |
| mmu-miR-29b-1*  | 17 | 24 | -0.34 | 1.41 | 0.50  |
| mmu-miR-3060    | 8  | 2  | 1.39  | 0.25 | -2.00 |
| mmu-miR-411     | 8  | 9  | -0.12 | 1.13 | 0.17  |
| mmu-miR-505-3p  | 24 | 12 | 0.69  | 0.50 | -1.00 |
| mmu-miR-5102    | 22 | 16 | 0.32  | 0.73 | -0.46 |
| mmu-miR-5128    | 8  | 2  | 1.39  | 0.25 | -2.00 |
| mmu-miR-188-3p  | 9  | 9  | 0.00  | 1.00 | 0.00  |
| mmu-miR-26a-1*  | 11 | 9  | 0.20  | 0.82 | -0.29 |
| mmu-miR-27a*    | 21 | 7  | 1.10  | 0.33 | -1.58 |
| mmu-miR-297a    | 17 | 10 | 0.53  | 0.59 | -0.77 |
| mmu-miR-3069-3p | 3  | 3  | 0.00  | 1.00 | 0.00  |
| mmu-miR-331-5p  | 14 | 7  | 0.69  | 0.50 | -1.00 |
| mmu-miR-381     | 11 | 8  | 0.32  | 0.73 | -0.46 |
| mmu-miR-466b-3p | 10 | 8  | 0.22  | 0.80 | -0.32 |
| mmu-miR-467a*   | 9  | 6  | 0.41  | 0.67 | -0.58 |
| mmu-miR-505-5p  | 16 | 6  | 0.98  | 0.38 | -1.42 |
| mmu-miR-139-5p  | 12 | 12 | 0.00  | 1.00 | 0.00  |
| mmu-miR-181b-1* | 16 | 7  | 0.83  | 0.44 | -1.19 |
| mmu-miR-190b    | 31 | 18 | 0.54  | 0.58 | -0.78 |
| mmu-miR-1965    | 11 | 2  | 1.70  | 0.18 | -2.46 |
| mmu-miR-200b*   | 8  | 9  | -0.12 | 1.13 | 0.17  |
| mmu-miR-301b*   | 5  | 3  | 0.51  | 0.60 | -0.74 |
| mmu-miR-3085-3p | 8  | 4  | 0.69  | 0.50 | -1.00 |
| mmu-miR-3089-3p | 8  | 4  | 0.69  | 0.50 | -1.00 |
| mmu-miR-470     | 15 | 3  | 1.61  | 0.20 | -2.32 |
| mmu-miR-501-5p  | 10 | 8  | 0.22  | 0.80 | -0.32 |
| mmu-miR-5117    | 8  | 6  | 0.29  | 0.75 | -0.42 |
| mmu-miR-103-2*  | 11 | 9  | 0.20  | 0.82 | -0.29 |
| mmu-miR-1306-3p | 7  | 11 | -0.45 | 1.57 | 0.65  |
| mmu-miR-137*    | 11 | 8  | 0.32  | 0.73 | -0.46 |
| mmu-miR-181c    | 8  | 7  | 0.13  | 0.88 | -0.19 |
| mmu-miR-182*    | 12 | 14 | -0.15 | 1.17 | 0.22  |
| mmu-miR-1957    | 7  | 4  | 0.56  | 0.57 | -0.81 |
| mmu-miR-200a*   | 22 | 10 | 0.79  | 0.45 | -1.14 |
| mmu-miR-208b    | 6  | 8  | -0.29 | 1.33 | 0.42  |
| mmu-miR-3057-3p | 5  | 0  |       |      |       |
| mmu-miR-3470a   | 7  | 2  | 1.25  | 0.29 | -1.81 |
| mmu-miR-652*    | 4  | 3  | 0.29  | 0.75 | -0.42 |
| mmu-miR-879*    | 7  | 10 | -0.36 | 1.43 | 0.51  |
| mmu-miR-130a*   | 5  | 5  | 0.00  | 1.00 | 0.00  |
| mmu-miR-136*    | 4  | 1  | 1.39  | 0.25 | -2.00 |
| mmu-miR-185*    | 5  | 8  | -0.47 | 1.60 | 0.68  |
| mmu-miR-193b    | 7  | 3  | 0.85  | 0.43 | -1.22 |
| mmu-miR-1943    | 9  | 9  | 0.00  | 1.00 | 0.00  |
| mmu-miR-1945    | 8  | 6  | 0.29  | 0.75 | -0.42 |
| mmu-miR-297c    | 13 | 9  | 0.37  | 0.69 | -0.53 |

|                 |    |    |       |      |       |
|-----------------|----|----|-------|------|-------|
| mmu-miR-3061-5p | 6  | 3  | 0.69  | 0.50 | -1.00 |
| mmu-miR-326     | 27 | 11 | 0.90  | 0.41 | -1.30 |
| mmu-miR-34a*    | 5  | 2  | 0.92  | 0.40 | -1.32 |
| mmu-miR-409-3p  | 8  | 3  | 0.98  | 0.38 | -1.42 |
| mmu-miR-467b    | 8  | 5  | 0.47  | 0.63 | -0.68 |
| mmu-miR-5122    | 1  | 1  | 0.00  | 1.00 | 0.00  |
| mmu-miR-874*    | 14 | 9  | 0.44  | 0.64 | -0.64 |
| mmu-miR-1251    | 5  | 2  | 0.92  | 0.40 | -1.32 |
| mmu-miR-192*    | 9  | 8  | 0.12  | 0.89 | -0.17 |
| mmu-miR-341     | 5  | 1  | 1.61  | 0.20 | -2.32 |
| mmu-miR-342-5p  | 15 | 15 | 0.00  | 1.00 | 0.00  |
| mmu-miR-344b    | 6  | 4  | 0.41  | 0.67 | -0.58 |
| mmu-miR-3968    | 3  | 2  | 0.41  | 0.67 | -0.58 |
| mmu-miR-5113    | 3  | 2  | 0.41  | 0.67 | -0.58 |
| mmu-miR-5126    | 7  | 2  | 1.25  | 0.29 | -1.81 |
| mmu-miR-669e*   | 8  | 2  | 1.39  | 0.25 | -2.00 |
| mmu-miR-669f-3p | 15 | 8  | 0.63  | 0.53 | -0.91 |
| mmu-miR-669m-3p | 2  | 3  | -0.41 | 1.50 | 0.58  |
| mmu-miR-99a*    | 11 | 5  | 0.79  | 0.45 | -1.14 |
| mmu-miR-1224*   | 4  | 3  | 0.29  | 0.75 | -0.42 |
| mmu-miR-147     | 4  | 2  | 0.69  | 0.50 | -1.00 |
| mmu-miR-190*    | 4  | 12 | -1.10 | 3.00 | 1.58  |
| mmu-miR-221*    | 3  | 14 | -1.54 | 4.67 | 2.22  |
| mmu-miR-300     | 5  | 2  | 0.92  | 0.40 | -1.32 |
| mmu-miR-3069-5p | 7  | 5  | 0.34  | 0.71 | -0.49 |
| mmu-miR-3074-5p | 13 | 5  | 0.96  | 0.38 | -1.38 |
| mmu-miR-344f-3p | 2  | 1  | 0.69  | 0.50 | -1.00 |
| mmu-miR-466a-5p | 4  | 3  | 0.29  | 0.75 | -0.42 |
| mmu-miR-466d-5p | 8  | 3  | 0.98  | 0.38 | -1.42 |
| mmu-miR-466h-3p | 3  | 3  | 0.00  | 1.00 | 0.00  |
| mmu-miR-491*    | 3  | 0  |       |      |       |
| mmu-miR-497*    | 3  | 5  | -0.51 | 1.67 | 0.74  |
| mmu-miR-500*    | 7  | 1  | 1.95  | 0.14 | -2.81 |
| mmu-miR-5114    | 5  | 0  |       |      |       |
| mmu-miR-592     | 1  | 2  | -0.69 | 2.00 | 1.00  |
| mmu-miR-669p    | 6  | 4  | 0.41  | 0.67 | -0.58 |
| mmu-miR-760-3p  | 6  | 3  | 0.69  | 0.50 | -1.00 |
| mmu-miR-873     | 5  | 2  | 0.92  | 0.40 | -1.32 |
| mmu-miR-92b*    | 3  | 2  | 0.41  | 0.67 | -0.58 |
| mmu-miR-1843-3p | 1  | 0  |       |      |       |
| mmu-miR-1929    | 7  | 2  | 1.25  | 0.29 | -1.81 |
| mmu-miR-1950    | 3  | 1  | 1.10  | 0.33 | -1.58 |
| mmu-miR-1960    | 0  | 0  |       |      |       |
| mmu-miR-199a-3p | 1  | 1  | 0.00  | 1.00 | 0.00  |
| mmu-miR-297a*   | 6  | 1  | 1.79  | 0.17 | -2.58 |
| mmu-miR-3066*   | 2  | 0  |       |      |       |
| mmu-miR-3092    | 2  | 1  | 0.69  | 0.50 | -1.00 |

|                 |    |    |       |      |       |
|-----------------|----|----|-------|------|-------|
| mmu-miR-3098-3p | 3  | 3  | 0.00  | 1.00 | 0.00  |
| mmu-miR-351     | 1  | 2  | -0.69 | 2.00 | 1.00  |
| mmu-miR-378b    | 3  | 3  | 0.00  | 1.00 | 0.00  |
| mmu-miR-466f-5p | 5  | 3  | 0.51  | 0.60 | -0.74 |
| mmu-miR-466l-3p | 2  | 1  | 0.69  | 0.50 | -1.00 |
| mmu-miR-466n-5p | 9  | 4  | 0.81  | 0.44 | -1.17 |
| mmu-miR-598*    | 6  | 1  | 1.79  | 0.17 | -2.58 |
| mmu-miR-669o-3p | 3  | 2  | 0.41  | 0.67 | -0.58 |
| mmu-miR-704     | 1  | 3  | -1.10 | 3.00 | 1.58  |
| mmu-miR-881     | 3  | 0  |       |      |       |
| mmu-miR-103-1*  | 1  | 1  | 0.00  | 1.00 | 0.00  |
| mmu-miR-107*    | 8  | 4  | 0.69  | 0.50 | -1.00 |
| mmu-miR-1195    | 1  | 0  |       |      |       |
| mmu-miR-1199*   | 0  | 1  |       |      |       |
| mmu-miR-122*    | 14 | 7  | 0.69  | 0.50 | -1.00 |
| mmu-miR-134     | 1  | 0  |       |      |       |
| mmu-miR-146b*   | 2  | 0  |       |      |       |
| mmu-miR-187*    | 1  | 1  | 0.00  | 1.00 | 0.00  |
| mmu-miR-1930    | 8  | 2  | 1.39  | 0.25 | -2.00 |
| mmu-miR-1930*   | 0  | 0  |       |      |       |
| mmu-miR-1934*   | 1  | 2  | -0.69 | 2.00 | 1.00  |
| mmu-miR-194-2*  | 16 | 8  | 0.69  | 0.50 | -1.00 |
| mmu-miR-1955-5p | 12 | 10 | 0.18  | 0.83 | -0.26 |
| mmu-miR-1969    | 3  | 1  | 1.10  | 0.33 | -1.58 |
| mmu-miR-199b    | 2  | 0  |       |      |       |
| mmu-miR-1b-3p   | 4  | 2  | 0.69  | 0.50 | -1.00 |
| mmu-miR-215*    | 4  | 2  | 0.69  | 0.50 | -1.00 |
| mmu-miR-218     | 3  | 1  | 1.10  | 0.33 | -1.58 |
| mmu-miR-297a-5* | 3  | 3  | 0.00  | 1.00 | 0.00  |
| mmu-miR-297b-3p | 2  | 1  | 0.69  | 0.50 | -1.00 |
| mmu-miR-3064-3p | 0  | 1  |       |      |       |
| mmu-miR-3067    | 4  | 0  |       |      |       |
| mmu-miR-3078*   | 3  | 1  | 1.10  | 0.33 | -1.58 |
| mmu-miR-3080-3p | 6  | 5  | 0.18  | 0.83 | -0.26 |
| mmu-miR-3080-5p | 1  | 1  | 0.00  | 1.00 | 0.00  |
| mmu-miR-3082-5p | 0  | 0  |       |      |       |
| mmu-miR-3084*   | 0  | 3  |       |      |       |
| mmu-miR-3088    | 0  | 2  |       |      |       |
| mmu-miR-3103    | 1  | 0  |       |      |       |
| mmu-miR-3108    | 3  | 2  | 0.41  | 0.67 | -0.58 |
| mmu-miR-344g-5p | 4  | 2  | 0.69  | 0.50 | -1.00 |
| mmu-miR-3474    | 0  | 2  |       |      |       |
| mmu-miR-34c     | 0  | 0  |       |      |       |
| mmu-miR-434-3p  | 2  | 0  |       |      |       |
| mmu-miR-466c-3p | 3  | 1  | 1.10  | 0.33 | -1.58 |
| mmu-miR-466m-3p | 1  | 2  | -0.69 | 2.00 | 1.00  |
| mmu-miR-467e*   | 4  | 1  | 1.39  | 0.25 | -2.00 |

|                       |   |    |       |      |       |
|-----------------------|---|----|-------|------|-------|
| mmu-miR-499           | 1 | 0  |       |      |       |
| mmu-miR-615-3p        | 0 | 0  |       |      |       |
| mmu-miR-669i          | 0 | 0  |       |      |       |
| mmu-miR-669p*         | 3 | 2  | 0.41  | 0.67 | -0.58 |
| mmu-miR-701           | 1 | 4  | -1.39 | 4.00 | 2.00  |
| mmu-miR-802*          | 2 | 4  | -0.69 | 2.00 | 1.00  |
| mmu-miR-871-3p        | 9 | 5  | 0.59  | 0.56 | -0.85 |
| novel_mmu-mir-101c-3p | 2 | 2  | 0.00  | 1.00 | 0.00  |
| novel_mmu-mir-5132-3p | 3 | 1  | 1.10  | 0.33 | -1.58 |
| mmu-let-7c-1*         | 4 | 0  |       |      |       |
| mmu-miR-101b*         | 1 | 0  |       |      |       |
| mmu-miR-1198-3p       | 8 | 1  | 2.08  | 0.13 | -3.00 |
| mmu-miR-128-2*        | 2 | 1  | 0.69  | 0.50 | -1.00 |
| mmu-miR-1306-5p       | 0 | 1  |       |      |       |
| mmu-miR-142-5p        | 2 | 0  |       |      |       |
| mmu-miR-144*          | 0 | 2  |       |      |       |
| mmu-miR-150           | 0 | 1  |       |      |       |
| mmu-miR-181d          | 4 | 2  | 0.69  | 0.50 | -1.00 |
| mmu-miR-190b*         | 0 | 0  |       |      |       |
| mmu-miR-1927          | 3 | 2  | 0.41  | 0.67 | -0.58 |
| mmu-miR-194-1*        | 0 | 1  |       |      |       |
| mmu-miR-1941-3p       | 0 | 2  |       |      |       |
| mmu-miR-1943*         | 3 | 0  |       |      |       |
| mmu-miR-1953          | 0 | 3  |       |      |       |
| mmu-miR-1955-3p       | 5 | 2  | 0.92  | 0.40 | -1.32 |
| mmu-miR-199a-5p       | 3 | 1  | 1.10  | 0.33 | -1.58 |
| mmu-miR-201           | 0 | 0  |       |      |       |
| mmu-miR-203*          | 0 | 0  |       |      |       |
| mmu-miR-205           | 2 | 0  |       |      |       |
| mmu-miR-218-1*        | 0 | 0  |       |      |       |
| mmu-miR-224           | 2 | 1  | 0.69  | 0.50 | -1.00 |
| mmu-miR-28c           | 1 | 1  | 0.00  | 1.00 | 0.00  |
| mmu-miR-294           | 0 | 0  |       |      |       |
| mmu-miR-295           | 0 | 0  |       |      |       |
| mmu-miR-298*          | 0 | 0  |       |      |       |
| mmu-miR-3062          | 1 | 0  |       |      |       |
| mmu-miR-3064-5p       | 1 | 2  | -0.69 | 2.00 | 1.00  |
| mmu-miR-3075          | 2 | 1  | 0.69  | 0.50 | -1.00 |
| mmu-miR-3081          | 3 | 2  | 0.41  | 0.67 | -0.58 |
| mmu-miR-3099*         | 1 | 0  |       |      |       |
| mmu-miR-3104-3p       | 0 | 2  |       |      |       |
| mmu-miR-3112          | 0 | 1  |       |      |       |
| mmu-miR-328*          | 1 | 0  |       |      |       |
| mmu-miR-344e          | 0 | 0  |       |      |       |
| mmu-miR-344f-5p       | 2 | 1  | 0.69  | 0.50 | -1.00 |
| mmu-miR-3572          | 5 | 11 | -0.79 | 2.20 | 1.14  |
| mmu-miR-365           | 0 | 1  |       |      |       |

|                         |   |   |       |      |       |
|-------------------------|---|---|-------|------|-------|
| mmu-miR-369-3p          | 1 | 0 |       |      |       |
| mmu-miR-369-5p          | 0 | 0 |       |      |       |
| mmu-miR-374c            | 0 | 0 |       |      |       |
| mmu-miR-376c            | 0 | 0 |       |      |       |
| mmu-miR-379             | 1 | 1 | 0.00  | 1.00 | 0.00  |
| mmu-miR-380-3p          | 2 | 0 |       |      |       |
| mmu-miR-382             | 0 | 0 |       |      |       |
| mmu-miR-429*            | 0 | 0 |       |      |       |
| mmu-miR-448-3p          | 0 | 0 |       |      |       |
| mmu-miR-449a            | 0 | 0 |       |      |       |
| mmu-miR-463*            | 2 | 1 | 0.69  | 0.50 | -1.00 |
| mmu-miR-465b-5p         | 1 | 0 |       |      |       |
| mmu-miR-465c-5p         | 2 | 2 | 0.00  | 1.00 | 0.00  |
| mmu-miR-466a-3p         | 1 | 1 | 0.00  | 1.00 | 0.00  |
| mmu-miR-466e-3p         | 1 | 1 | 0.00  | 1.00 | 0.00  |
| mmu-miR-466e-5p         | 0 | 1 |       |      |       |
| mmu-miR-466p-3p         | 2 | 0 |       |      |       |
| mmu-miR-466p-5p         | 4 | 3 | 0.29  | 0.75 | -0.42 |
| mmu-miR-466q            | 1 | 0 |       |      |       |
| mmu-miR-467c*           | 3 | 0 |       |      |       |
| mmu-miR-467d*           | 2 | 1 | 0.69  | 0.50 | -1.00 |
| mmu-miR-491             | 5 | 0 |       |      |       |
| mmu-miR-5119            | 0 | 0 |       |      |       |
| mmu-miR-5134            | 0 | 1 |       |      |       |
| mmu-miR-547             | 0 | 0 |       |      |       |
| mmu-miR-668             | 0 | 0 |       |      |       |
| mmu-miR-669b*           | 2 | 1 | 0.69  | 0.50 | -1.00 |
| mmu-miR-669c*           | 0 | 1 |       |      |       |
| mmu-miR-669h-5p         | 2 | 2 | 0.00  | 1.00 | 0.00  |
| mmu-miR-672*            | 0 | 0 |       |      |       |
| mmu-miR-873*            | 1 | 0 |       |      |       |
| mmu-miR-880             | 0 | 0 |       |      |       |
| mmu-miR-96*             | 1 | 3 | -1.10 | 3.00 | 1.58  |
| novel_mmu-mir-184-5p    | 3 | 1 | 1.10  | 0.33 | -1.58 |
| novel_mmu-mir-1935-3p   | 0 | 0 |       |      |       |
| novel_mmu-mir-1938-3p   | 0 | 0 |       |      |       |
| novel_mmu-mir-1969-3p   | 0 | 0 |       |      |       |
| novel_mmu-mir-3470b-3p  | 2 | 0 |       |      |       |
| novel_mmu-mir-3473d-3p  | 2 | 0 |       |      |       |
| novel_mmu-mir-5098-3p   | 1 | 0 |       |      |       |
| novel_mmu-mir-5128-5p   | 0 | 2 |       |      |       |
| novel_mmu-mir-5133-3p   | 0 | 0 |       |      |       |
| novel_mmu-mir-5134-3p   | 3 | 0 |       |      |       |
| novel_mmu-mir-669d-2-3p | 0 | 0 |       |      |       |
| novel_mmu-mir-669j-5p   | 0 | 0 |       |      |       |
| novel_mmu-mir-686-3p    | 0 | 0 |       |      |       |
| mmu-miR-100             | 0 | 0 |       |      |       |



|                 |   |   |       |      |       |
|-----------------|---|---|-------|------|-------|
| mmu-miR-1186    | 1 | 1 | 0.00  | 1.00 | 0.00  |
| mmu-miR-1187    | 3 | 0 |       |      |       |
| mmu-miR-1298    | 0 | 1 |       |      |       |
| mmu-miR-133a    | 1 | 1 | 0.00  | 1.00 | 0.00  |
| mmu-miR-135a-2* | 0 | 0 |       |      |       |
| mmu-miR-136     | 0 | 0 |       |      |       |
| mmu-miR-139-3p  | 3 | 0 |       |      |       |
| mmu-miR-142-3p  | 0 | 1 |       |      |       |
| mmu-miR-144     | 0 | 1 |       |      |       |
| mmu-miR-155     | 0 | 0 |       |      |       |
| mmu-miR-181c*   | 1 | 0 |       |      |       |
| mmu-miR-193     | 0 | 2 |       |      |       |
| mmu-miR-1932    | 1 | 1 | 0.00  | 1.00 | 0.00  |
| mmu-miR-1933-5p | 1 | 0 |       |      |       |
| mmu-miR-1936    | 0 | 0 |       |      |       |
| mmu-miR-1940    | 1 | 0 |       |      |       |
| mmu-miR-1949    | 0 | 1 |       |      |       |
| mmu-miR-1951    | 0 | 0 |       |      |       |
| mmu-miR-1956    | 0 | 1 |       |      |       |
| mmu-miR-1958    | 0 | 0 |       |      |       |
| mmu-miR-1964-5p | 0 | 1 |       |      |       |
| mmu-miR-1966    | 1 | 0 |       |      |       |
| mmu-miR-1968*   | 0 | 1 |       |      |       |
| mmu-miR-196a    | 0 | 0 |       |      |       |
| mmu-miR-196b    | 1 | 0 |       |      |       |
| mmu-miR-1970    | 0 | 0 |       |      |       |
| mmu-miR-199b*   | 2 | 1 | 0.69  | 0.50 | -1.00 |
| mmu-miR-19b     | 0 | 0 |       |      |       |
| mmu-miR-1b-5p   | 1 | 2 | -0.69 | 2.00 | 1.00  |
| mmu-miR-201*    | 0 | 0 |       |      |       |
| mmu-miR-211     | 2 | 1 | 0.69  | 0.50 | -1.00 |
| mmu-miR-222*    | 1 | 1 | 0.00  | 1.00 | 0.00  |
| mmu-miR-23a*    | 0 | 1 |       |      |       |
| mmu-miR-23b*    | 2 | 0 |       |      |       |
| mmu-miR-291a-5p | 0 | 0 |       |      |       |
| mmu-miR-297c*   | 1 | 1 | 0.00  | 1.00 | 0.00  |
| mmu-miR-299*    | 0 | 0 |       |      |       |
| mmu-miR-302b    | 1 | 0 |       |      |       |
| mmu-miR-3058    | 1 | 0 |       |      |       |
| mmu-miR-3058*   | 4 | 0 |       |      |       |
| mmu-miR-3065    | 2 | 3 | -0.41 | 1.50 | 0.58  |
| mmu-miR-3067*   | 1 | 0 |       |      |       |
| mmu-miR-3076-3p | 3 | 3 | 0.00  | 1.00 | 0.00  |
| mmu-miR-3076-5p | 0 | 1 |       |      |       |
| mmu-miR-3077    | 1 | 1 | 0.00  | 1.00 | 0.00  |
| mmu-miR-3083    | 1 | 0 |       |      |       |
| mmu-miR-3086-3p | 1 | 1 | 0.00  | 1.00 | 0.00  |

|                 |   |   |      |      |       |
|-----------------|---|---|------|------|-------|
| mmu-miR-3086-5p | 1 | 0 |      |      |       |
| mmu-miR-3087    | 2 | 1 | 0.69 | 0.50 | -1.00 |
| mmu-miR-3087*   | 0 | 1 |      |      |       |
| mmu-miR-3091-3p | 0 | 0 |      |      |       |
| mmu-miR-3091-5p | 0 | 0 |      |      |       |
| mmu-miR-3095-3p | 0 | 0 |      |      |       |
| mmu-miR-3096-3p | 0 | 0 |      |      |       |
| mmu-miR-3101    | 0 | 1 |      |      |       |
| mmu-miR-3101*   | 3 | 0 |      |      |       |
| mmu-miR-3102*   | 1 | 0 |      |      |       |
| mmu-miR-3109*   | 0 | 0 |      |      |       |
| mmu-miR-3110    | 0 | 3 |      |      |       |
| mmu-miR-3113    | 2 | 0 |      |      |       |
| mmu-miR-320*    | 1 | 0 |      |      |       |
| mmu-miR-322     | 1 | 0 |      |      |       |
| mmu-miR-329*    | 0 | 1 |      |      |       |
| mmu-miR-344*    | 0 | 1 |      |      |       |
| mmu-miR-344d-1* | 0 | 1 |      |      |       |
| mmu-miR-344g-3p | 4 | 1 | 1.39 | 0.25 | -2.00 |
| mmu-miR-3471    | 0 | 1 |      |      |       |
| mmu-miR-376b*   | 0 | 1 |      |      |       |
| mmu-miR-377     | 0 | 0 |      |      |       |
| mmu-miR-379*    | 0 | 1 |      |      |       |
| mmu-miR-3970    | 0 | 0 |      |      |       |
| mmu-miR-411*    | 1 | 0 |      |      |       |
| mmu-miR-449a*   | 0 | 0 |      |      |       |
| mmu-miR-450b-5p | 0 | 1 |      |      |       |
| mmu-miR-451     | 0 | 1 |      |      |       |
| mmu-miR-465a-5p | 1 | 1 | 0.00 | 1.00 | 0.00  |
| mmu-miR-465c-3p | 0 | 0 |      |      |       |
| mmu-miR-466b-5p | 2 | 0 |      |      |       |
| mmu-miR-466i-5p | 0 | 0 |      |      |       |
| mmu-miR-466j    | 0 | 0 |      |      |       |
| mmu-miR-466k    | 2 | 0 |      |      |       |
| mmu-miR-466l-5p | 1 | 0 |      |      |       |
| mmu-miR-466m-5p | 0 | 0 |      |      |       |
| mmu-miR-466o-3p | 0 | 0 |      |      |       |
| mmu-miR-466o-5p | 0 | 0 |      |      |       |
| mmu-miR-467b*   | 1 | 0 |      |      |       |
| mmu-miR-467f    | 1 | 0 |      |      |       |
| mmu-miR-471-5p  | 1 | 0 |      |      |       |
| mmu-miR-486*    | 0 | 0 |      |      |       |
| mmu-miR-494     | 0 | 1 |      |      |       |
| mmu-miR-5097    | 5 | 3 | 0.51 | 0.60 | -0.74 |
| mmu-miR-5100    | 2 | 0 |      |      |       |
| mmu-miR-5105    | 2 | 0 |      |      |       |
| mmu-miR-511-3p  | 1 | 0 |      |      |       |

|                         |   |   |       |      |       |
|-------------------------|---|---|-------|------|-------|
| mmu-miR-5116            | 0 | 0 |       |      |       |
| mmu-miR-5120            | 1 | 0 |       |      |       |
| mmu-miR-5123            | 1 | 2 | -0.69 | 2.00 | 1.00  |
| mmu-miR-5125            | 1 | 0 |       |      |       |
| mmu-miR-5132            | 0 | 0 |       |      |       |
| mmu-miR-666-3p          | 2 | 0 |       |      |       |
| mmu-miR-666-5p          | 0 | 0 |       |      |       |
| mmu-miR-667             | 1 | 1 | 0.00  | 1.00 | 0.00  |
| mmu-miR-669g            | 2 | 0 |       |      |       |
| mmu-miR-669k*           | 1 | 1 | 0.00  | 1.00 | 0.00  |
| mmu-miR-669l*           | 1 | 1 | 0.00  | 1.00 | 0.00  |
| mmu-miR-669m-5p         | 0 | 0 |       |      |       |
| mmu-miR-673-5p          | 1 | 0 |       |      |       |
| mmu-miR-693-5p          | 0 | 1 |       |      |       |
| mmu-miR-701*            | 0 | 0 |       |      |       |
| mmu-miR-702             | 2 | 0 |       |      |       |
| mmu-miR-709             | 1 | 1 | 0.00  | 1.00 | 0.00  |
| mmu-miR-712             | 0 | 1 |       |      |       |
| mmu-miR-714             | 1 | 2 | -0.69 | 2.00 | 1.00  |
| mmu-miR-742             | 1 | 0 |       |      |       |
| mmu-miR-743a            | 1 | 0 |       |      |       |
| mmu-miR-743b-3p         | 0 | 1 |       |      |       |
| mmu-miR-760-5p          | 2 | 0 |       |      |       |
| mmu-miR-878-5p          | 1 | 1 | 0.00  | 1.00 | 0.00  |
| mmu-miR-9*              | 0 | 0 |       |      |       |
| mmu-miR-92a             | 1 | 0 |       |      |       |
| novel_mmu-mir-1192-3p   | 0 | 0 |       |      |       |
| novel_mmu-mir-1951-5p   | 1 | 1 | 0.00  | 1.00 | 0.00  |
| novel_mmu-mir-3470a-3p  | 1 | 0 |       |      |       |
| novel_mmu-mir-3572-5p   | 0 | 1 |       |      |       |
| novel_mmu-mir-466f-1-3p | 1 | 0 |       |      |       |
| novel_mmu-mir-466f-2-3p | 0 | 1 |       |      |       |
| novel_mmu-mir-466q-5p   | 1 | 0 |       |      |       |
| novel_mmu-mir-5105-3p   | 4 | 2 | 0.69  | 0.50 | -1.00 |
| novel_mmu-mir-5125-5p   | 0 | 0 |       |      |       |
| novel_mmu-mir-5129-3p   | 1 | 0 |       |      |       |
| novel_mmu-mir-5131-5p   | 1 | 0 |       |      |       |
| novel_mmu-mir-714-3p    | 1 | 0 |       |      |       |

|     | Ratio | FC   | Log2FC |
|-----|-------|------|--------|
| avg | 0.43  | 0.72 | -0.62  |
| sd  | 0.45  | 0.42 | 0.65   |
